# Supplementary material for: Au-catalyzed cascade addition/cyclization/H-transfer reactions of 3-(1-alkynyl)chromones to construct 4H-Furo[3,2-c]pyrans scaffold
Source: Royal Society of Chemistry journal article supplement (doi:10.1039/c2ra22268j), 2012-01-01

## Supplementary Information

### **Au-catalyzed Cascade Addition/Cyclization/H-transfer Reactions of 3-(1-alkynyl)chromones to Construct 4*H*-Furo[3, 2-*c*]pyrans Scaffold†**

Feng Hu,<sup>a</sup> Taijie Chen<sup>b</sup>, Jianwei Yan,<sup>a</sup> Ming Cheng<sup>a</sup>, Liping Huang<sup>a</sup> and Youhong Hu<sup>\*a</sup>

<sup>a</sup> Address State Key Laboratory of Drug Research, Shanghai Institute of Materia Medica, CAS, 555 Zu Chong Zhi Road, Shanghai 201203, P. R. China.

<sup>b</sup> Department of Chemistry, East China Normal University, 3663 North Zhongshan Road, Shanghai 200062, P. R. China.

E-mail: [yhhu@mail.shcnc.ac.cn](mailto:yhhu@mail.shcnc.ac.cn).

#### **Contents of Supplementary Information:**

|                                                   |        |
|---------------------------------------------------|--------|
| 1. General information                            | S1     |
| 2. A typical procedure for Table 2                | S1     |
| 3. Characterization of the products               | S2-S7  |
| 4. <sup>1</sup> H and <sup>13</sup> C NMR spectra | S8-S30 |

## General information

Solvents were purified according to *Purification of Laboratory Chemicals* except as noted. Petroleum ether refers to the fraction with boiling point in the range 60–90 °C. All  $^1\text{H}$  NMR and  $^{13}\text{C}$  NMR spectra were measured with TMS as the internal standard on a 500, 400 or 300 MHz NMR spectrometer. Chemical shift are expressed in ppm and  $J$  value are given in Hz. High resolution mass spectra were recorded on a mass spectrometer (EI). Column chromatography was performed with 300–400 mesh silica gel using flash column techniques.

## A typical procedure for Table 2

To the solution of the substrates **1** (0.30 mmol) in dichloromethane (3 mL) was added  $(\text{PPh}_3)\text{AuCl}$  (0.003 mmol),  $\text{AgOTf}$  (0.003 mmol) and hydrogen source **3** (0.36 mmol, 1.2 eq). The mixture was stirred at room temperature for the corresponding time and then evaporated. The crude product was directly purified by column chromatography to afford the corresponding product **2**.

## Characterization of the products

### 2-phenyl-4H-furo[3,2-c]chromene (**2a**)

White solid; Yield: 90%; mp 91-92 °C;  $^1\text{H}$  NMR (400MHz,  $\text{CDCl}_3$ ):  $\delta$  = 7.78 – 7.67 (m, 2H), 7.48 (dd,  $J$  = 7.5, 1.7 Hz, 1H), 7.44 – 7.38 (m, 2H), 7.33 – 7.25 (m, 1H), 7.19 -7.07 (m, 1H), 7.02 – 6.94 (m, 1H), 6.93 – 6.86 (m, 1H), 6.54 (s, 1H), 5.41 (s, 2H);  $^{13}\text{C}$  NMR (100MHz,  $\text{CDCl}_3$ ):  $\delta$  = 154.3, 152.9, 145.3, 130.4, 128.7, 128.4, 127.5, 123.6, 121.5, 119.4, 116.7, 116.1, 115.6, 103.2, 65.8; HRMS calcd for  $\text{C}_{17}\text{H}_{12}\text{O}_2$ : 248.0837, found: 248.0841.

### 2-(4-(trifluoromethyl)phenyl)-4H-furo[3,2-c]chromene (**2b**)

Colorless oil; Yield: 87%  $^1\text{H}$  NMR (500MHz,  $\text{CDCl}_3$ ):  $\delta$  = 7.71 (d,  $J$  = 8.3 Hz, 2H), 7.57 (d,  $J$  = 8.4 Hz, 2H), 7.41 (dd,  $J$  = 7.5, 1.5 Hz, 1H), 7.08 (td,  $J$  = 7.8, 1.5 Hz, 1H), 6.92 (dt,  $J$  = 7.4, 3.7 Hz, 1H), 6.83 (d,  $J$  = 8.1 Hz, 1H), 6.57 (s, 1H), 5.33 (s, 2H);  $^{13}\text{C}$  NMR (125MHz,  $\text{CDCl}_3$ ):  $\delta$  = 153.2, 152.8, 146.6, 133.5, 129.1 (q,  $J$  = 25.6 Hz), 129.0, 125.8 (q,  $J$  = 2.8 Hz), 124.2 (q,  $J$  = 215.2 Hz), 123.6, 121.6, 119.7, 116.4, 115.8, 105.2, 65.7; HRMS calcd for  $\text{C}_{18}\text{H}_{11}\text{F}_3\text{O}_2$ : 316.0711, found: 316.0715.

### 2-(4-methoxyphenyl)-4H-furo[3,2-c]chromene (**2c**)

Colorless oil; Yield: 84%;  $^1\text{H}$  NMR (500MHz,  $\text{CDCl}_3$ ):  $\delta$  = 7.62 – 7.55 (m, 2H), 7.38 (dd,  $J$  = 7.5, 1.6 Hz, 1H), 7.03 (td,  $J$  = 7.9, 1.6 Hz, 1H), 6.93 – 6.86 (m, 3H), 6.80 (d,  $J$  = 8.1 Hz, 1H), 6.34 (s, 1H), 5.34 (s, 2H), 3.78 (s, 3H);  $^{13}\text{C}$  NMR

(125MHz, CDCl<sub>3</sub>):  $\delta$  = 159.3, 154.6, 152.8, 144.7, 128.1, 125.2, 123.5, 121.5, 119.2, 116.9, 116.1, 115.7, 114.2, 101.7, 66.0, 55.4; HRMS calcd for C<sub>18</sub>H<sub>14</sub>O<sub>3</sub>: 278.0943, found: 278.0944.

#### 4-(4H-furo[3,2-c]chromen-2-yl)butanenitrile (**2d**)

Yellow oil; Yield: 81% <sup>1</sup>H NMR (500MHz, CDCl<sub>3</sub>):  $\delta$  = 7.31 (dd,  $J$  = 7.5, 1.6 Hz, 1H), 7.11 – 7.04 (m, 1H), 6.91 (t,  $J$  = 7.5 Hz, 1H), 6.84 (d,  $J$  = 8.1 Hz, 1H), 5.98 (s, 1H), 5.33 (s, 2H), 2.90 – 2.80 (m, 2H), 2.40 (t,  $J$  = 7.1 Hz, 2H), 2.04 (p,  $J$  = 7.1 Hz, 2H); <sup>13</sup>C NMR (125MHz, CDCl<sub>3</sub>):  $\delta$  = 154.1, 152.6, 144.9, 128.2, 121.4, 119.2, 119.1, 116.9, 116.1, 114.2, 105.0, 65.9, 26.9, 24.1, 16.4; HRMS calcd for C<sub>15</sub>H<sub>13</sub>NO<sub>2</sub>: 239.0946, found: 239.0950.

#### 2-(tert-butyl)-4H-furo[3,2-c]chromene (**2e**)

Colorless oil; Yield: 71%; <sup>1</sup>H NMR (300MHz, CDCl<sub>3</sub>):  $\delta$  = 7.35 (d,  $J$  = 8.0 Hz, 1H), 7.10 – 7.01 (m, 1H), 6.95 – 6.87 (m, 1H), 6.83 (d,  $J$  = 8.0 Hz, 1H), 5.87 (s, 1H), 5.34 (s, 2H), 1.33 (s, 9H). <sup>13</sup>C NMR (125MHz, CDCl<sub>3</sub>):  $\delta$  = 165.3, 152.5, 143.8, 127.7, 121.3, 119.0, 117.3, 115.9, 114.0, 100.6, 66.2, 33.0, 29.1; HRMS calcd for C<sub>15</sub>H<sub>16</sub>O<sub>2</sub>: 228.1150, found: 228.1153.

#### 8-chloro-2-phenyl-4H-furo[3,2-c]chromene (**2f**)

White solid; Yield: 72%; mp 121-123 °C; <sup>1</sup>H NMR (500MHz, CDCl<sub>3</sub>):  $\delta$  = 7.64 (d,  $J$  = 8.3 Hz, 2H), 7.38 – 7.32 (m, 3H), 7.24 (d,  $J$  = 7.4 Hz, 1H), 6.97 (dd,  $J$  = 8.6, 2.5 Hz, 1H), 6.72 (d,  $J$  = 8.6 Hz, 1H), 6.47 (s, 1H), 5.33 (s, 2H); <sup>13</sup>C NMR (125MHz, CDCl<sub>3</sub>):  $\delta$  = 155.1, 151.3, 144.2, 130.1, 128.8, 127.9, 127.8, 126.5, 123.8, 119.2, 117.9, 117.4, 116.6, 103.2, 66.1; HRMS calcd for C<sub>17</sub>H<sub>11</sub>ClO<sub>2</sub>: 282.0448, found: 282.0450.

#### 8-methoxy-2-phenyl-4H-furo[3,2-c]chromene (**2g**)

White solid; Yield: 91%; mp 109-111 °C; <sup>1</sup>H NMR (500MHz, CDCl<sub>3</sub>):  $\delta$  = 7.67 – 7.63 (m, 2H), 7.37 – 7.32 (m, 2H), 7.25 – 7.21 (m, 1H), 6.96 (d,  $J$  = 3.0 Hz, 1H), 6.76 (d,  $J$  = 8.8 Hz, 1H), 6.61 (dd,  $J$  = 8.8, 3.0 Hz, 1H), 6.48 (s, 1H), 5.26 (s, 2H), 3.77 (s, 3H); <sup>13</sup>C NMR (125MHz, CDCl<sub>3</sub>):  $\delta$  = 154.5, 154.5, 146.9, 145.6, 130.4, 128.8, 127.7, 123.8, 117.3, 116.9, 116.6, 113.8, 104.5, 103.4, 65.6, 55.9; HRMS calcd for C<sub>18</sub>H<sub>14</sub>O<sub>3</sub>: 278.0943, found: 278.0944.

#### 4-methyl-2-phenyl-4H-furo[3,2-c]chromene (**2h**)

Colorless oil; Yield: 88%; <sup>1</sup>H NMR (300MHz, CDCl<sub>3</sub>):  $\delta$  = 7.77 – 7.69 (m, 2H), 7.48 (dd,  $J$  = 7.4, 1.3 Hz, 1H), 7.45 - 7.37 (m, 2H), 7.33 – 7.24 (m, 1H), 7.16 – 7.09 (m, 1H), 7.00 – 6.93 (m, 1H), 6.90 (d,  $J$  = 8.0 Hz, 1H), 6.54 (s, 1H), 5.65 (q,

$J = 6.5$  Hz, 1H), 1.67 (d,  $J = 6.5$  Hz, 3H);  $^{13}\text{C}$  NMR (125MHz,  $\text{CDCl}_3$ ):  $\delta = 154.3, 152.7, 145.1, 130.5, 128.8, 128.4, 127.6, 123.7, 121.3, 120.6, 119.4, 116.5, 116.4, 103.1, 72.8, 22.0$ ; HRMS calcd for  $\text{C}_{18}\text{H}_{14}\text{O}_2$ : 262.0994, found: 262.0997.

#### 4-ethyl-2-phenyl-4H-furo[3,2-c]chromene (**2i**)

Colorless oil; Yield: 80%;  $^1\text{H}$  NMR (400MHz,  $\text{CDCl}_3$ ):  $\delta = 7.76 - 7.70$  (m, 2H), 7.49 (dd,  $J = 7.5, 1.6$  Hz, 1H), 7.45 – 7.38 (m, 2H), 7.31- 7.27 (m, 1H), 7.13 (t,  $J = 7.8$  Hz, 1H), 6.96 (t,  $J = 7.5$  Hz, 1H), 6.91 (d,  $J = 8.1$  Hz, 1H), 6.54 (s, 1H), 5.49 (t,  $J = 5.8$  Hz, 1H), 2.02 – 1.92 (m, 2H), 1.10 (t,  $J = 7.4$  Hz, 3H).  $^{13}\text{C}$  NMR (125MHz,  $\text{CDCl}_3$ ):  $\delta = 154.2, 152.9, 145.4, 130.5, 128.8, 128.4, 127.6, 123.7, 121.1, 119.4, 119.2, 116.3, 116.3, 103.5, 77.6, 29.3, 9.1$ ; HRMS calcd for  $\text{C}_{19}\text{H}_{16}\text{O}_2$ : 276.1150, found: 276.1156.

#### 2,4-diphenyl-4H-furo[3,2-c]chromene (**2j**)

Colorless oil; Yield: 52%;  $^1\text{H}$  NMR (500MHz,  $\text{CDCl}_3$ ):  $\delta = 7.74 - 7.68$  (m, 2H), 7.58 (dd,  $J = 7.5, 1.6$  Hz, 1H), 7.54 – 7.50 (m, 2H), 7.47 - 7.37 (m, 5H), 7.33 – 7.27 (m, 1H), 7.20 – 7.12 (m, 1H), 7.02 (td,  $J = 7.5, 1.0$  Hz, 1H), 6.95 (d,  $J = 8.1$  Hz, 1H), 6.54 (s, 1H), 6.40 (s, 1H);  $^{13}\text{C}$  NMR (125MHz,  $\text{CDCl}_3$ ):  $\delta = 154.4, 152.6, 145.4, 140.4, 130.4, 128.9, 128.8, 128.7, 127.7, 127.5, 123.7, 121.5, 119.6, 118.8, 116.5, 116.2, 104.2, 78.7$ ; HRMS calcd for  $\text{C}_{23}\text{H}_{16}\text{O}_2$ : 324.1150, found: 324.1156.

#### 2-phenyl-4-(4-(trifluoromethyl)phenyl)-4H-furo[3,2-c]chromene (**2k**)

Colorless oil; Yield: 61%;  $^1\text{H}$  NMR (500MHz,  $\text{CDCl}_3$ ):  $\delta = 7.72 - 7.65$  (m, 4H), 7.61 (d,  $J = 8.1$  Hz, 2H), 7.59 – 7.54 (m, 1H), 7.40 (t,  $J = 7.7$  Hz, 2H), 7.29 (t,  $J = 7.4$  Hz, 1H), 7.19 – 7.14 (m, 1H), 7.02 (t,  $J = 7.5$  Hz, 1H), 6.93 (d,  $J = 8.1$  Hz, 1H), 6.57 (s, 1H), 6.39 (s, 1H).  $^{13}\text{C}$  NMR (125MHz,  $\text{CDCl}_3$ ):  $\delta = 154.7, 152.2, 145.3, 144.17, 130.8$  (q,  $J = 32.5$ ), 130.1, 128.8, 128.8, 127.8, 127.6, 125.7 (d,  $J = 3.75$ ), 124.0 (q,  $J = 270.0$ ), 123.7, 121.8, 119.6, 117.9, 116.4, 116.0, 103.8, 77.7; HRMS calcd for  $\text{C}_{24}\text{H}_{15}\text{F}_3\text{O}_2$ : 392.1024, found: 392.1028.

#### 4-(4-methoxyphenyl)-2-phenyl-4H-furo[3,2-c]chromene (**2l**)

Colorless oil; Yield: 50%;  $^1\text{H}$  NMR (400MHz,  $\text{CDCl}_3$ ):  $\delta = 7.73 - 7.67$  (m, 2H), 7.55 (dd,  $J = 7.5, 1.5$  Hz, 1H), 7.45 – 7.36 (m, 4H), 7.31 – 7.26 (m, 1H), 7.13 (td,  $J = 7.9, 1.6$  Hz, 1H), 6.99 (t,  $J = 7.5$  Hz, 1H), 6.96 – 6.87 (m, 3H), 6.49 (s, 1H), 6.39 (s, 1H), 3.82 (s, 3H).  $^{13}\text{C}$  NMR (100MHz,  $\text{CDCl}_3$ ):  $\delta = 160.1, 154.4, 152.6, 145.6, 132.5, 130.4, 129.1, 128.8, 128.6, 127.6, 123.7, 121.4, 119.5, 118.8, 116.5, 116.2, 114.1, 104.3, 78.3, 55.4$ ; HRMS calcd for  $\text{C}_{23}\text{H}_{16}\text{O}_2$ : 354.1256, found: 354.1261.

#### 4-methyl-2-(*p*-tolyl)-4H-furo[3,2-*c*]chromene (**2m**)

Colorless oil; Yield: 83%;  $^1\text{H}$  NMR (500MHz,  $\text{CDCl}_3$ ):  $\delta$  = 7.61 (d,  $J$  = 8.1 Hz, 2H), 7.46 (dd,  $J$  = 7.5, 1.1 Hz, 1H), 7.21 (d,  $J$  = 8.0 Hz, 2H), 7.10 (td,  $J$  = 8.0, 1.5 Hz, 1H), 6.99 – 6.92 (m, 1H), 6.88 (d,  $J$  = 8.1 Hz, 1H), 6.48 (s, 1H), 5.64 (q,  $J$  = 6.5 Hz, 1H), 2.38 (s, 3H), 1.66 (d,  $J$  = 6.5 Hz, 3H);  $^{13}\text{C}$  NMR (125MHz,  $\text{CDCl}_3$ ):  $\delta$  = 154.6, 152.6, 144.6, 137.5, 129.5, 128.2, 127.8, 123.7, 121.3, 120.6, 119.3, 116.6, 116.3, 102.4, 72.8, 22.0, 21.3; HRMS calcd for  $\text{C}_{19}\text{H}_{16}\text{O}_2$ : 276.1150, found: 276.1156.

#### 2-(4-methoxyphenyl)-4-methyl-4H-furo[3,2-*c*]chromene (**2n**)

Colorless oil; Yield: 86%;  $^1\text{H}$  NMR (500MHz,  $\text{CDCl}_3$ ):  $\delta$  = 7.67 – 7.62 (m, 2H), 7.45 (dd,  $J$  = 7.5, 1.5 Hz, 1H), 7.10 (td,  $J$  = 8.0, 1.6 Hz, 1H), 6.98 – 6.92 (m, 3H), 6.88 (d,  $J$  = 8.1 Hz, 1H), 6.40 (s, 1H), 5.63 (q,  $J$  = 6.5 Hz, 1H), 3.85 (s, 3H), 1.66 (d,  $J$  = 6.5 Hz, 3H);  $^{13}\text{C}$  NMR (125MHz,  $\text{CDCl}_3$ ):  $\delta$  = 159.3, 154.4, 152.6, 144.3, 128.1, 125.2, 123.6, 121.3, 120.7, 119.2, 116.6, 116.3, 114.2, 101.6, 72.8, 55.4, 22.0; HRMS calcd for  $\text{C}_{19}\text{H}_{16}\text{O}_3$ : 292.1099, found: 292.1103.

#### 2-(*tert*-butyl)-4-methyl-4H-furo[3,2-*c*]chromene (**2o**)

Colorless oil; Yield: 68%;  $^1\text{H}$  NMR (500MHz,  $\text{CDCl}_3$ ):  $\delta$  = 7.34 (dd,  $J$  = 7.5, 1.6 Hz, 1H), 7.07 – 7.03 (m, 1H), 6.90 (td,  $J$  = 7.5, 1.1 Hz, 1H), 6.84 (d,  $J$  = 8.1 Hz, 1H), 5.85 (s, 1H), 5.56 (q,  $J$  = 6.5 Hz, 1H), 1.60 (d,  $J$  = 6.5 Hz, 3H), 1.32 (s, 9H);  $^{13}\text{C}$  NMR (125MHz,  $\text{CDCl}_3$ ):  $\delta$  = 165.2, 152.3, 143.4, 127.6, 121.1, 118.9, 118.9, 117.0, 116.1, 100.3, 73.0, 33.0, 29.1, 22.0; HRMS calcd for  $\text{C}_{16}\text{H}_{18}\text{O}_2$ : 242.1307, found: 242.1310.

#### 8-methoxy-4-methyl-2-phenyl-4H-furo[3,2-*c*]chromene (**2p**)

Yellow oil; Yield: 83%;  $^1\text{H}$  NMR (500MHz,  $\text{CDCl}_3$ ):  $\delta$  = 7.72 (dd,  $J$  = 5.1, 3.4 Hz, 2H), 7.41 (dd,  $J$  = 10.7, 4.9 Hz, 2H), 7.30 – 7.26 (m, 1H), 7.03 (d,  $J$  = 3.0 Hz, 1H), 6.83 (d,  $J$  = 8.8 Hz, 1H), 6.67 (dd,  $J$  = 8.8, 3.0 Hz, 1H), 6.54 (s, 1H), 5.55 (q,  $J$  = 6.5 Hz, 1H), 3.83 (s, 3H), 1.64 (d,  $J$  = 6.5 Hz, 3H);  $^{13}\text{C}$  NMR (125MHz,  $\text{CDCl}_3$ ):  $\delta$  = 154.4, 154.3, 146.6, 145.2, 130.4, 128.8, 127.6, 123.7, 121.5, 117.1, 117.0, 113.9, 104.5, 103.2, 72.4, 55.9, 21.6; HRMS calcd for  $\text{C}_{19}\text{H}_{16}\text{O}_3$ : 292.1099, found: 292.1101.

#### 8-bromo-4-methyl-2-phenyl-4H-furo[3,2-*c*]chromene (**2q**)

Yellow oil; Yield: 77%;  $^1\text{H}$  NMR (400MHz,  $\text{CDCl}_3$ ):  $\delta$  = 7.73 – 7.68 (m, 2H), 7.56 (d,  $J$  = 2.4 Hz, 1H), 7.44 – 7.38 (m, 2H), 7.34 – 7.26 (m, 1H), 7.18 (dd,  $J$  = 8.6, 2.4 Hz, 1H), 6.75 (d,  $J$  = 8.6 Hz, 1H), 6.52 (s, 1H), 5.63 (q,  $J$  = 6.5 Hz, 1H), 1.65 (d,  $J$  = 6.5 Hz, 3H);  $^{13}\text{C}$  NMR (125MHz,  $\text{CDCl}_3$ ):  $\delta$  = 155.0, 151.6, 143.7,

130.8, 130.1, 128.8, 127.9, 123.8, 122.0, 121.5, 118.1, 113.5, 103.1, 73.1, 22.0; HRMS calcd for C<sub>18</sub>H<sub>13</sub>BrO<sub>2</sub>: 340.0099, found: 340.0103.

8-chloro-4-methyl-2-(thiophen-3-yl)-4H-furo[3,2-c]chromene (**2r**)

White solid; Yield: 75%; mp 77-79 °C; <sup>1</sup>H NMR (400MHz, CDCl<sub>3</sub>): δ = 7.55 (dd, *J* = 2.9, 1.2 Hz, 1H), 7.41 – 7.31 (m, 3H), 7.03 (dd, *J* = 8.6, 2.5 Hz, 1H), 6.79 (d, *J* = 8.6 Hz, 1H), 6.35 (s, 1H), 5.61 (q, *J* = 6.5 Hz, 1H), 1.64 (d, *J* = 6.5 Hz, 3H); <sup>13</sup>C NMR (100MHz, CDCl<sub>3</sub>): δ = 151.9, 151.0, 143.2, 131.8, 127.7, 126.5, 126.3, 124.5, 121.2, 119.6, 119.0, 117.5, 102.8, 73.0, 21.9; HRMS calcd for C<sub>16</sub>H<sub>11</sub>ClO<sub>2</sub>S: 302.0168, found: 302.0171.

Methyl 4-(4H-furo[3,2-c]chromen-2-yl)benzoate (**2s**)

Yellow solid; Yield: 81%; mp 130-131 °C; <sup>1</sup>H NMR (300 MHz, CDCl<sub>3</sub>) δ 8.05 (d, *J* = 8.7 Hz, 2H), 7.72 (d, *J* = 8.7 Hz, 2H), 7.47 (dd, *J* = 7.5, 1.6 Hz, 1H), 7.17 – 7.09 (m, 1H), 6.97 (td, *J* = 7.5, 1.1 Hz, 1H), 6.88 (dd, *J* = 8.1, 1.1 Hz, 1H), 6.64 (s, 1H), 5.39 (s, 2H), 3.92 (s, 3H) ppm; <sup>13</sup>C NMR (100 MHz, CDCl<sub>3</sub>) δ 166.83, 153.32, 146.69, 134.34, 130.27, 129.06, 128.69, 123.29, 121.72, 119.81, 116.42, 115.96, 105.59, 65.81, 52.26 ppm; HRMS calcd for C<sub>19</sub>H<sub>14</sub>O<sub>4</sub>: 306.0892, found: 306.0888.

2-phenyl-4H-furo[3,2-c]chromen-7-ol (**2t**)

White solid; Yield: 87%; mp 143-144 °C; <sup>1</sup>H NMR (300 MHz, CDCl<sub>3</sub>) δ 7.69 (d, *J* = 7.1 Hz, 2H), 7.39 (t, *J* = 7.6 Hz, 2H), 7.34 (d, *J* = 8.1 Hz, 1H), 7.26 (t, *J* = 8.1 Hz, 1H), 6.51 (s, 1H), 6.48 – 6.41 (m, 2H), 5.38 (s, 2H), 5.03 (s, 1H) ppm; <sup>13</sup>C NMR (100 MHz, CDCl<sub>3</sub>) δ 156.19, 154.60, 153.67, 145.69, 130.65, 128.86, 127.44, 123.60, 120.61, 113.32, 110.50, 108.59, 104.07, 103.33, 66.35 ppm; HRMS calcd for C<sub>17</sub>H<sub>12</sub>O<sub>3</sub>: 264.0786, found: 264.0788.

2-phenyl-4,5,6,7-tetrahydrobenzofuran (**2u**)

Colorless oil; Yield: 61%; <sup>1</sup>H NMR (400MHz, CDCl<sub>3</sub>): δ = 7.65 – 7.59 (m, 2H), 7.38 – 7.32 (m, 2H), 7.23 – 7.17 (m, 1H), 6.48 (s, 1H), 2.70 – 2.63 (m, 2H), 2.47 (m, 2H), 1.92 – 1.82 (m, 2H), 1.80 – 1.72 (m, 2H); <sup>13</sup>C NMR (125MHz, CDCl<sub>3</sub>): δ = 151.6, 150.8, 131.5, 128.6, 126.6, 123.3, 119.0, 106.0, 23.3, 23.2, 23.1, 22.2; HRMS calcd for C<sub>14</sub>H<sub>14</sub>O: 198.1045, found: 198.1050.

2-isopropyl-4H-furo[3,2-c]chromene (**2v**)

Colorless oil; Yield: 82%; <sup>1</sup>H NMR (500MHz, CDCl<sub>3</sub>): δ = 7.34 (dd, *J* = 7.5, 1.4 Hz, 1H), 7.06 (td, *J* = 8.0, 1.5 Hz, 1H), 6.94 – 6.90 (m, 1H), 6.86 – 6.82 (m, 1H), 5.88 (s, 1H), 5.35 (s, 2H), 3.04 – 2.97 (m, 1H), 1.30 (d, *J* = 6.9 Hz, 6H); <sup>13</sup>C

NMR (125MHz, CDCl<sub>3</sub>):  $\delta$  = 162.8, 152.5, 143.8, 127.7, 121.3, 118.9, 117.2, 115.9, 114.1, 101.3, 66.1, 28.1, 21.2; HRMS calcd for C<sub>14</sub>H<sub>14</sub>O<sub>2</sub>: 214.0994, found: 214.0996.

2-(2-hydroxyphenyl)-5-phenylfuran-3-carbaldehyde (**2w**)

White solid; Yield: 72%; mp 131-133 °C; <sup>1</sup>H NMR (500MHz, DMSO-*d*<sub>6</sub>):  $\delta$  = 10.39 (s, 1H), 9.97 (s, 1H), 7.84 – 7.81 (m, 2H), 7.62 (dd, *J* = 8.2, 1.6 Hz, 1H), 7.47 (t, *J* = 7.7 Hz, 2H), 7.41 – 7.34 (m, 2H), 7.33 (s, 1H), 7.08 – 7.05 (m, 1H), 7.01 (t, *J* = 7.6 Hz, 1H); <sup>13</sup>C NMR (125MHz, DMSO-*d*<sub>6</sub>):  $\delta$  = 187.2, 158.4, 155.5, 154.0, 132.3, 131.1, 129.6, 129.5, 128.9, 124.9, 124.4, 120.1, 117.0, 116.2, 104.1; HRMS calcd for C<sub>17</sub>H<sub>12</sub>O<sub>3</sub>: 264.0786, found: 264.0790.

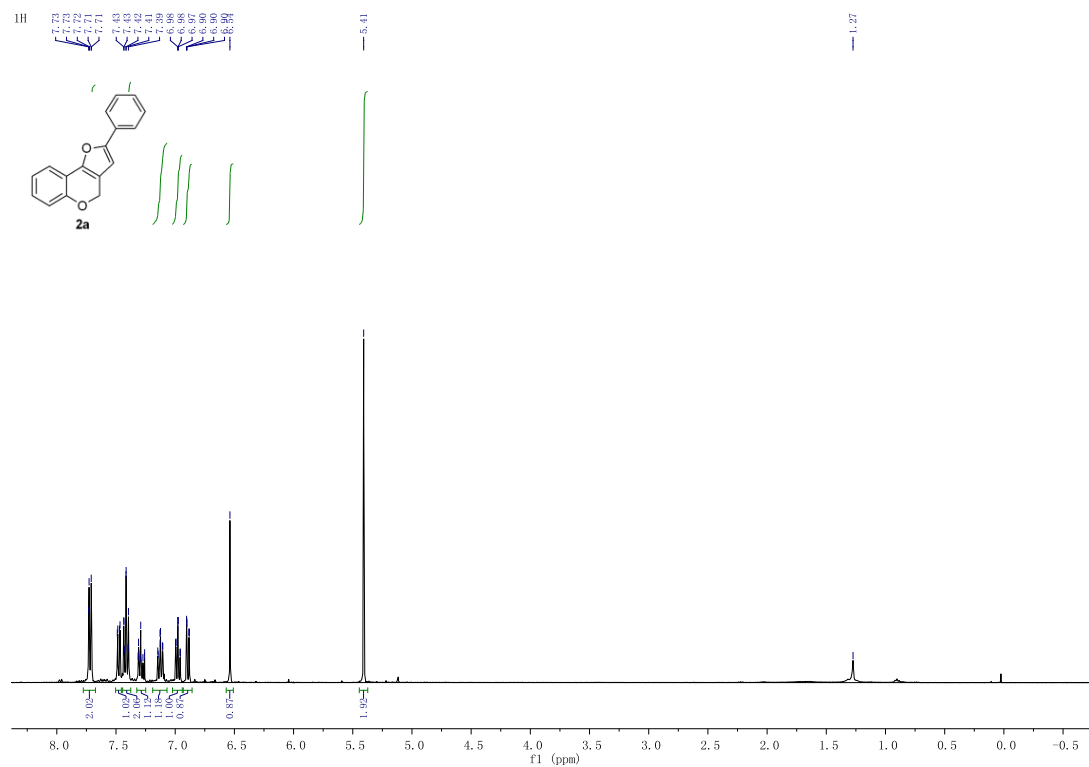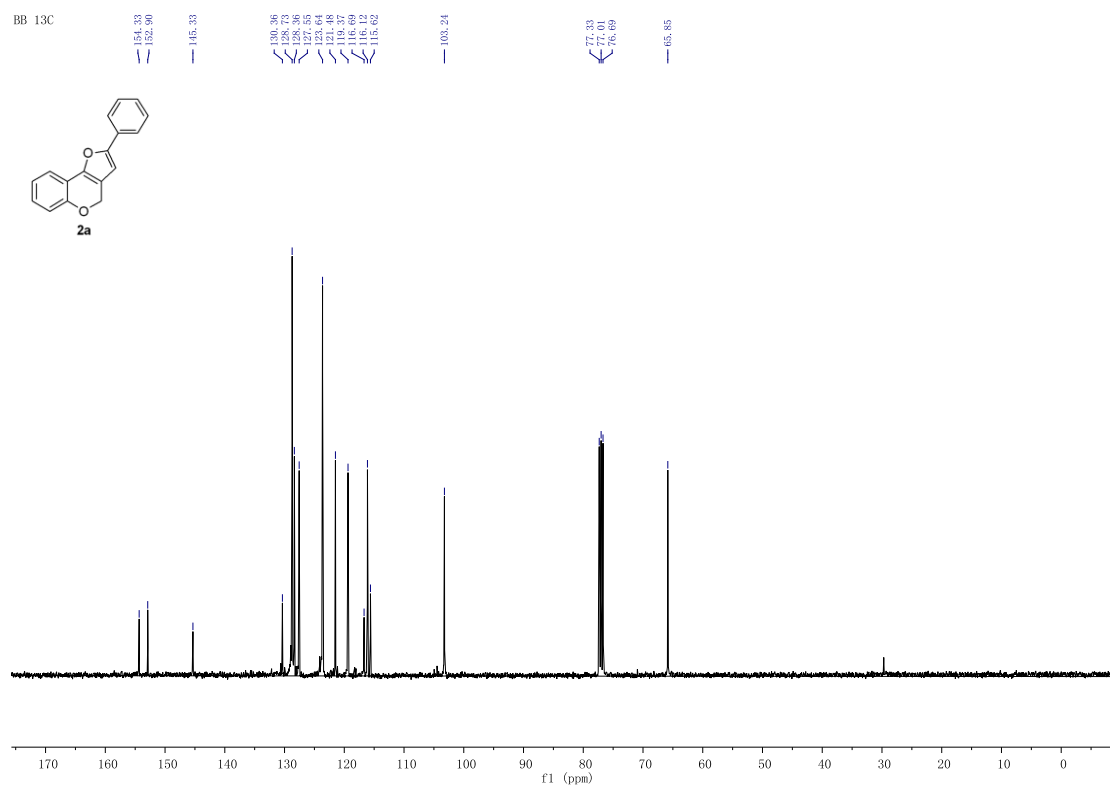



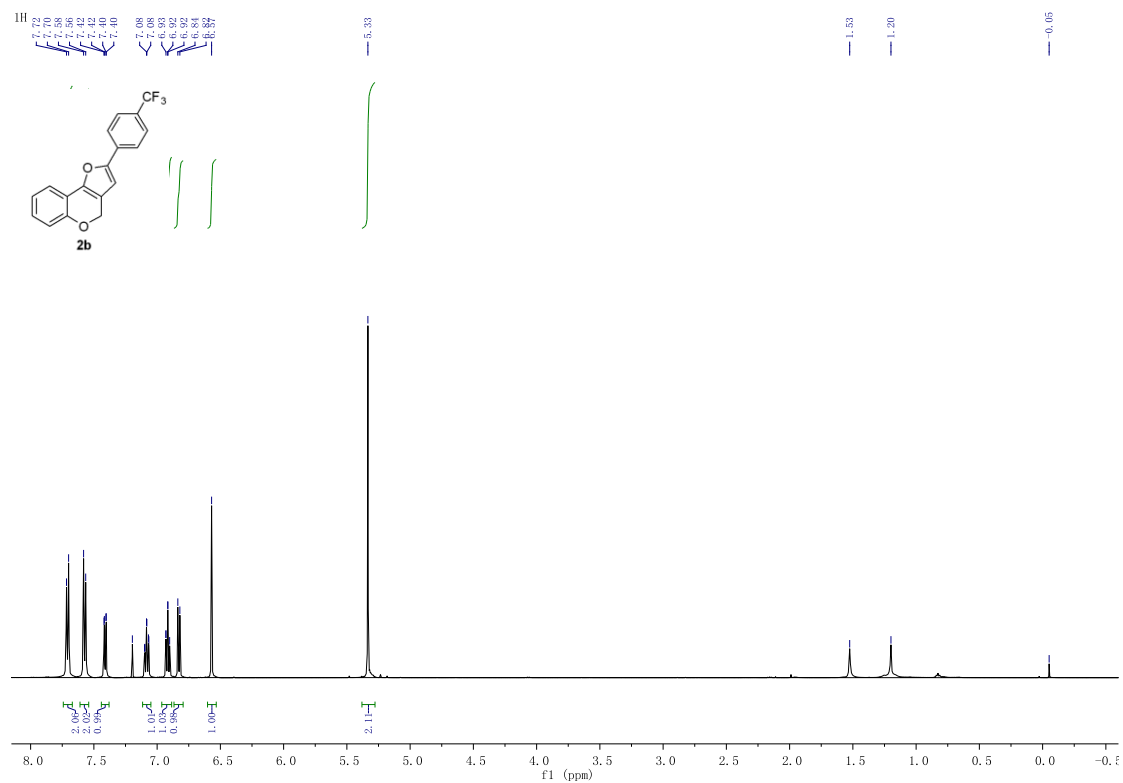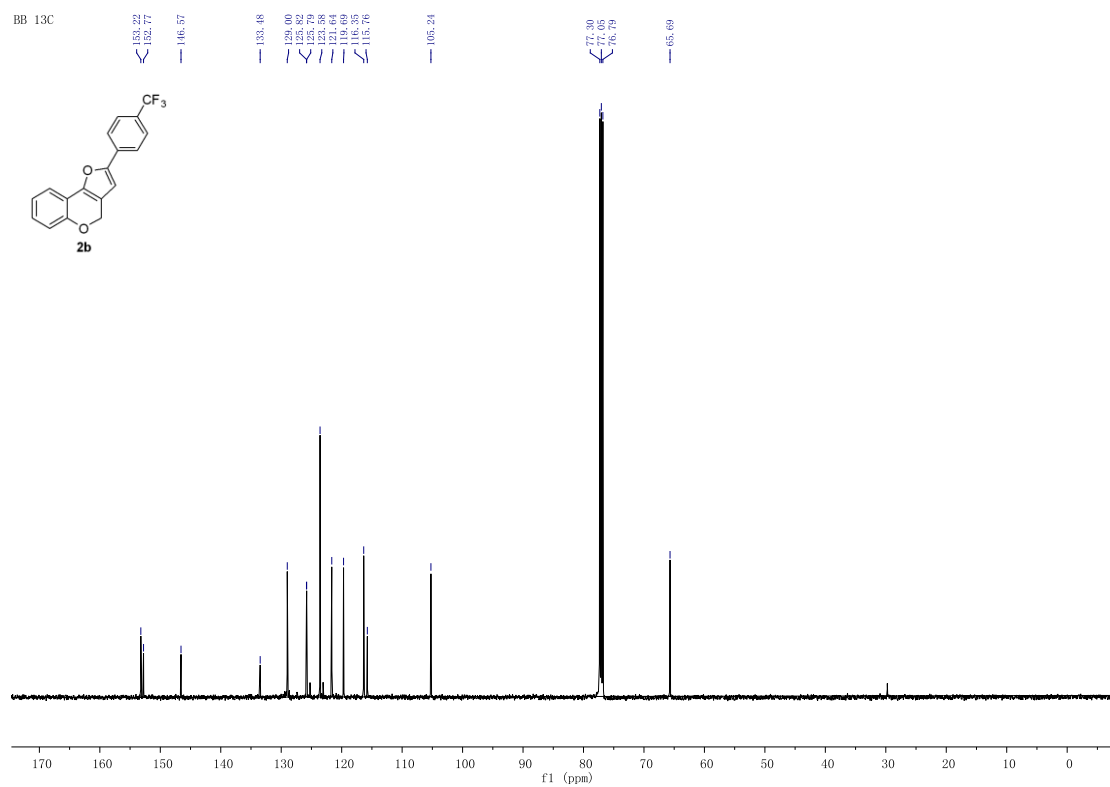

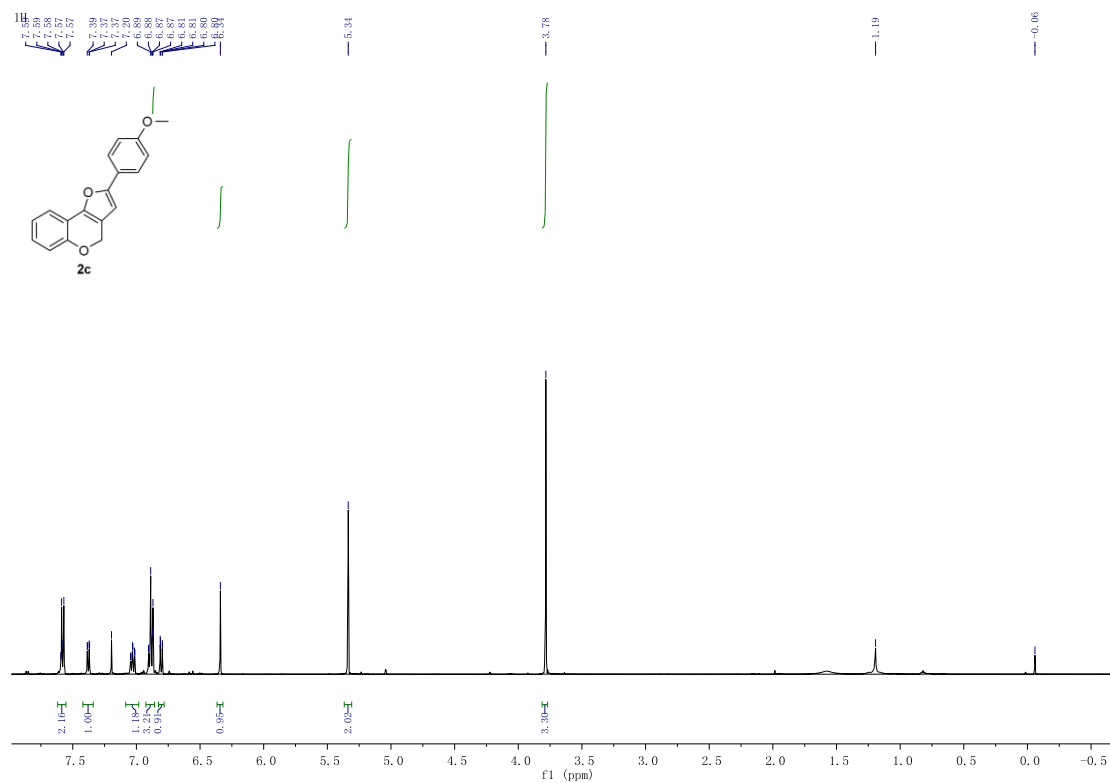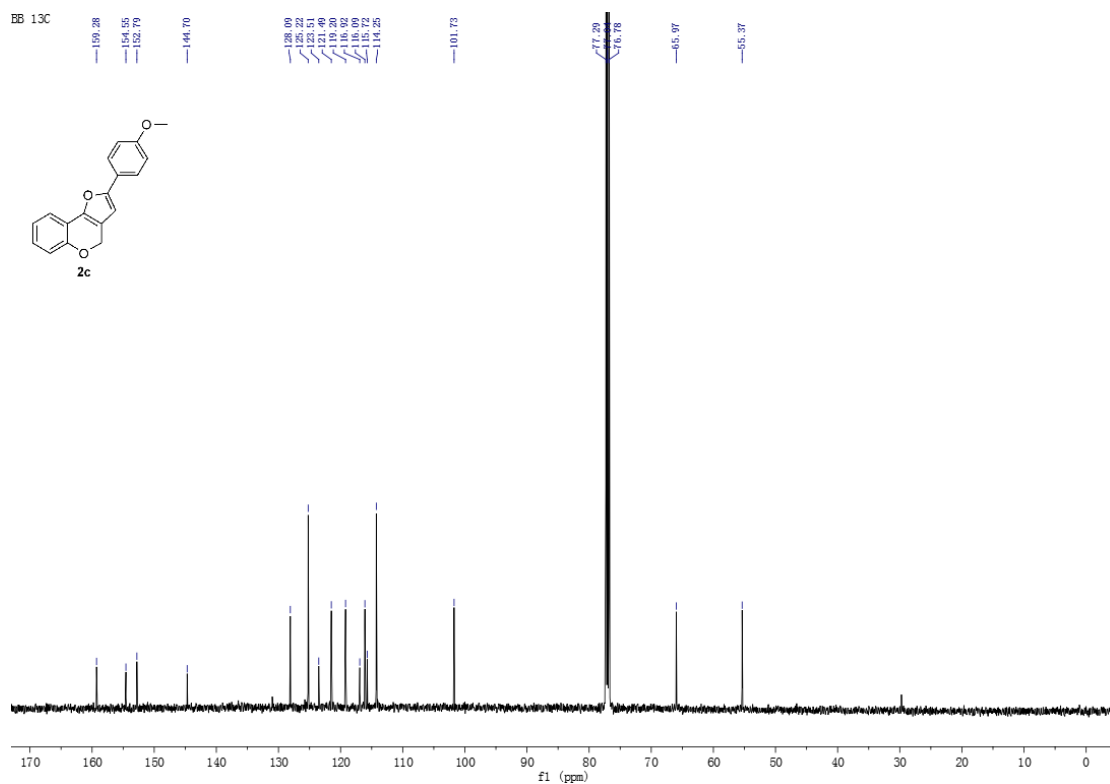

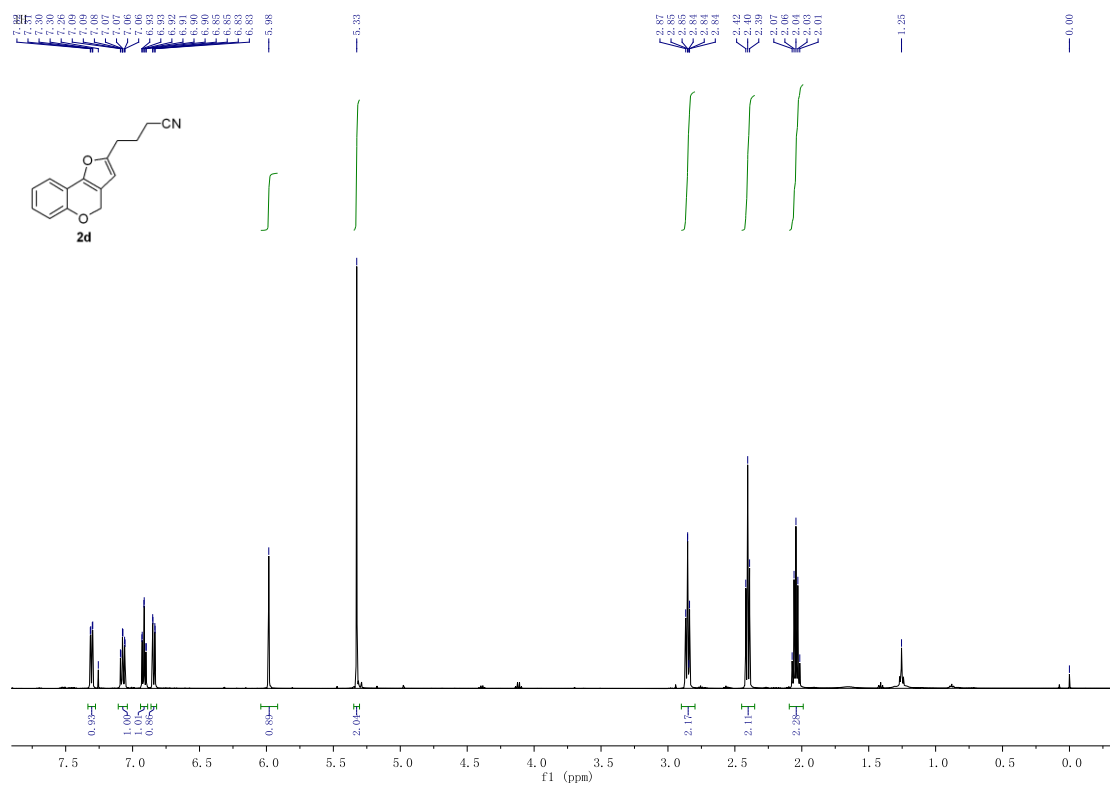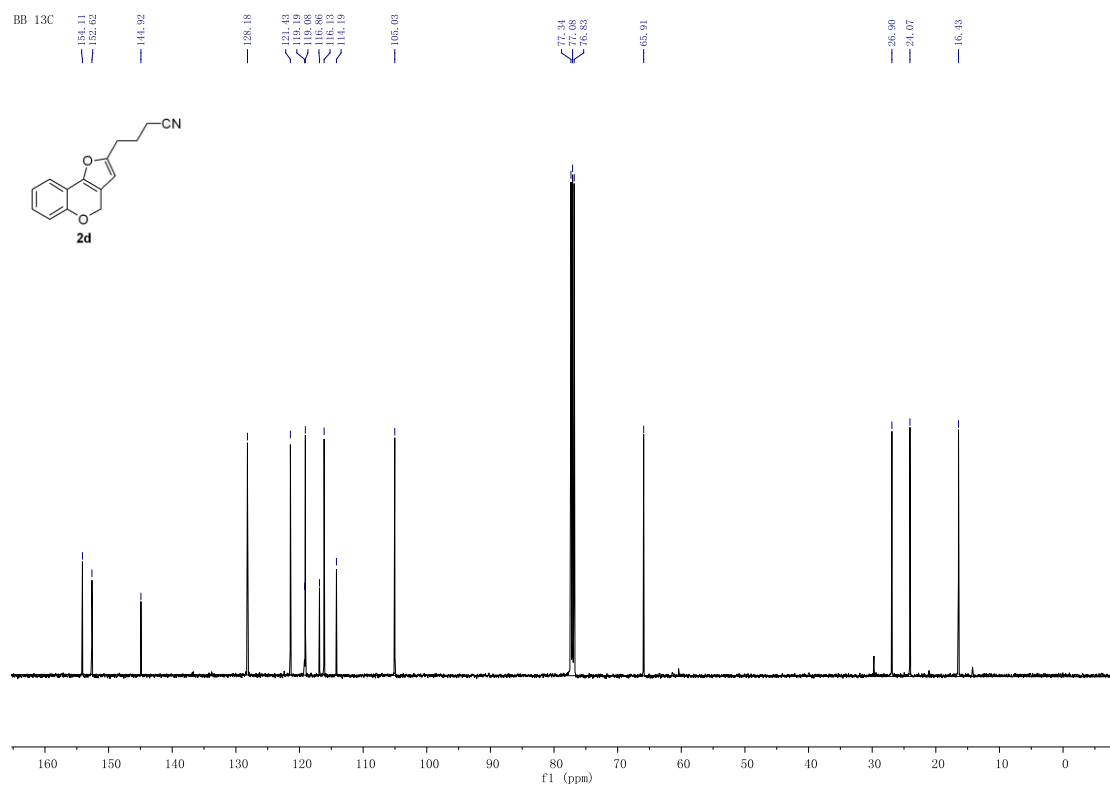

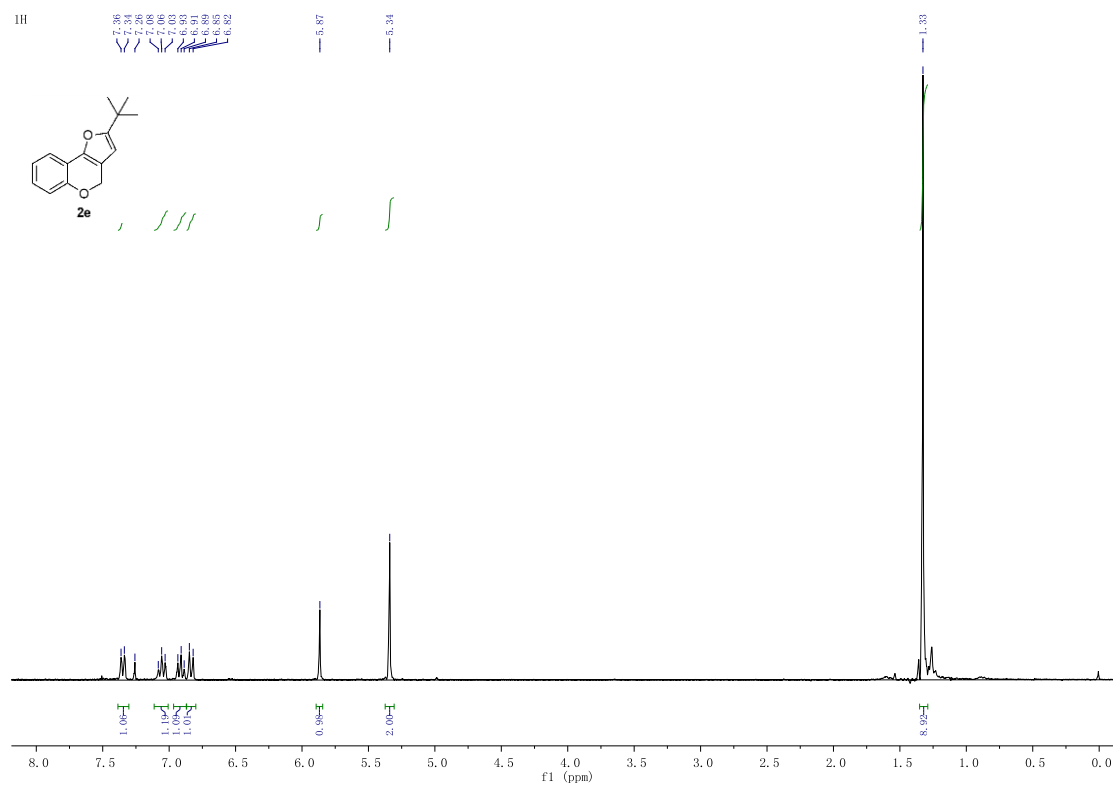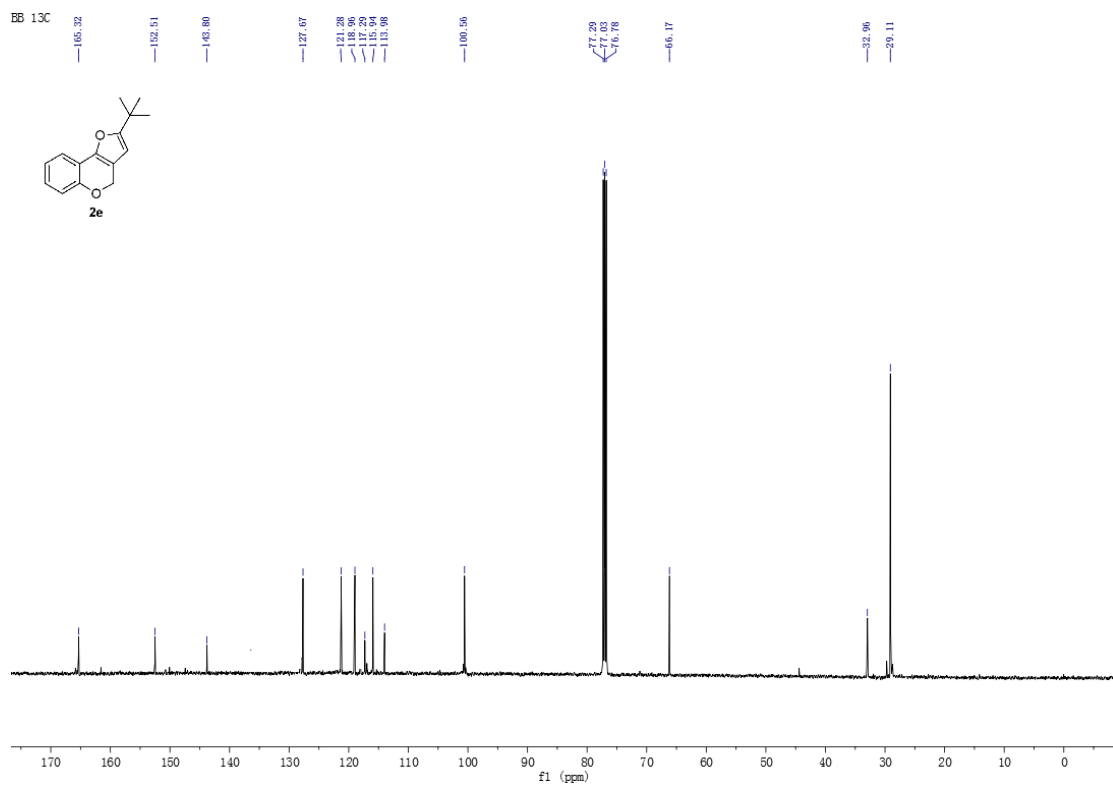

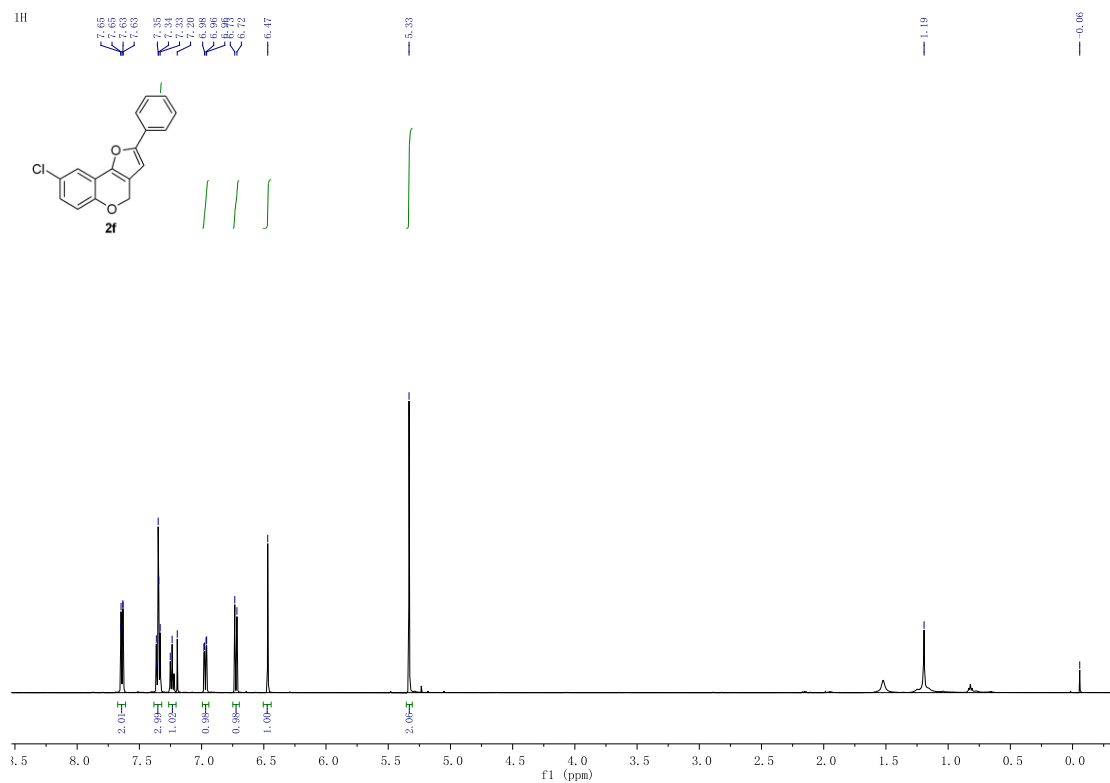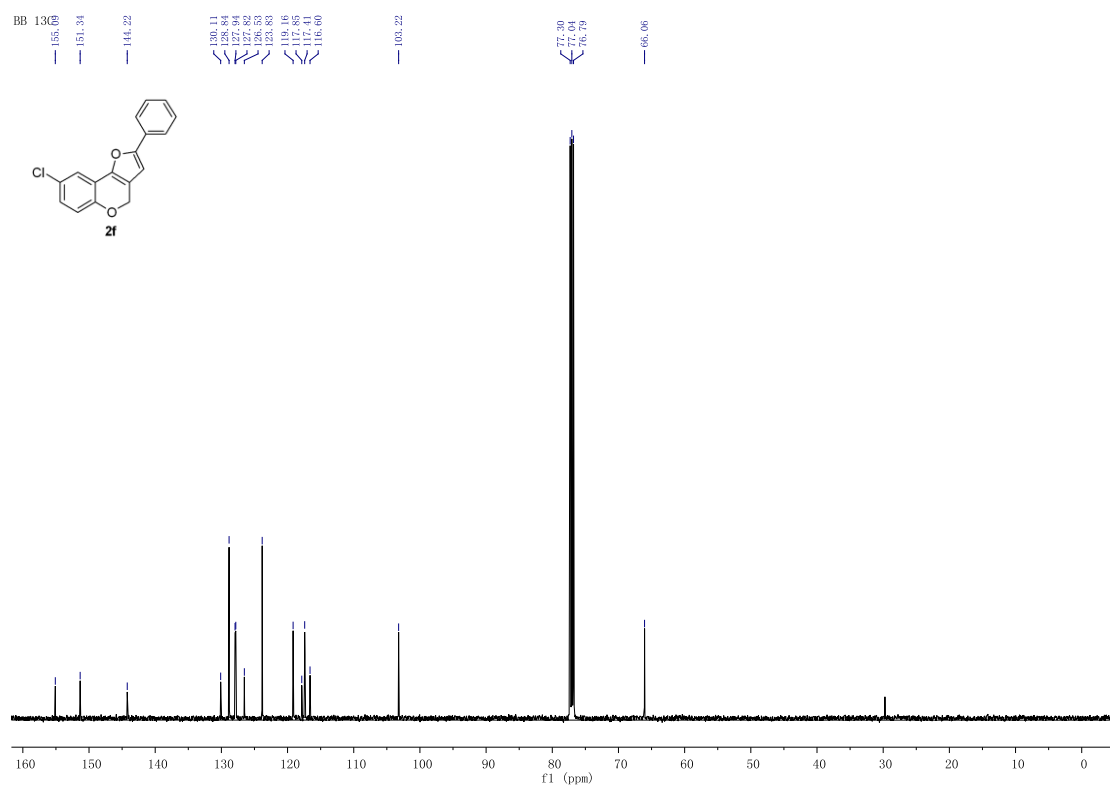

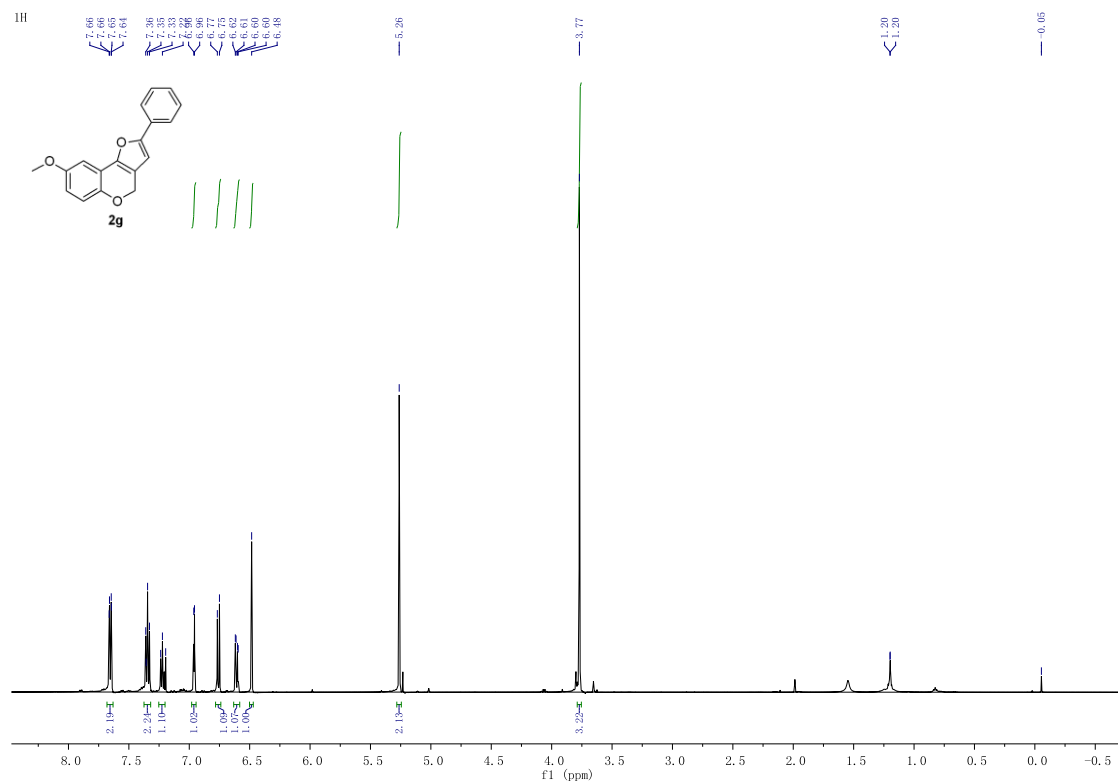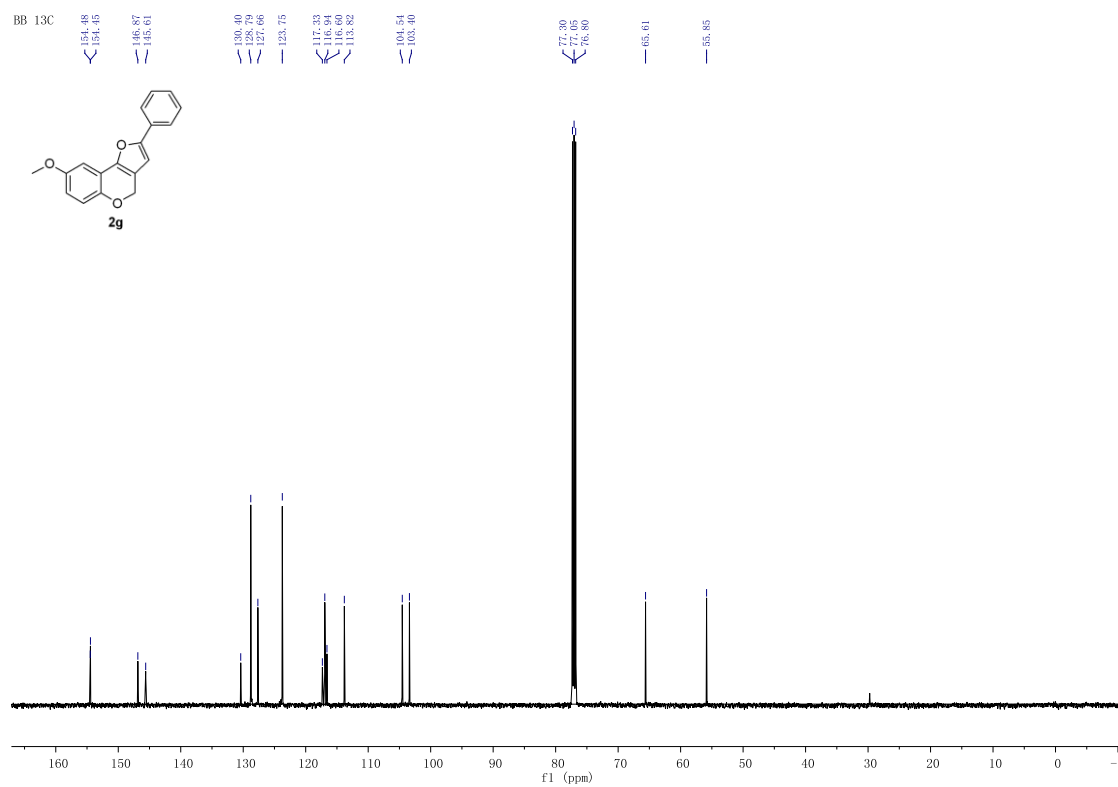

h1p91  
STANDARD 1H OBSERVE

7.73  
7.53  
7.50  
7.49  
7.41  
7.39  
7.28  
7.18  
7.15  
7.13  
7.02  
7.00  
6.99  
6.97  
6.95  
6.92  
6.91  
5.69  
5.65  
5.63

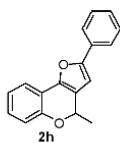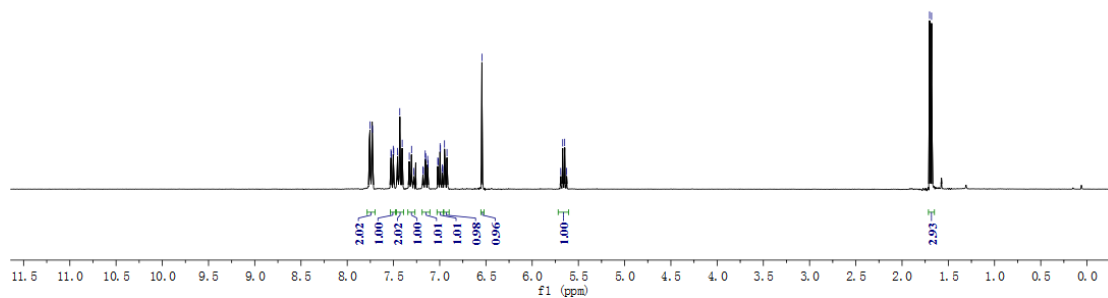

BB 13C

154.31  
152.74  
146.06

130.48  
128.70  
128.43  
127.57

123.68  
120.62  
119.40  
118.36

103.12

77.32  
77.06  
76.81

22.00

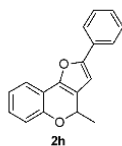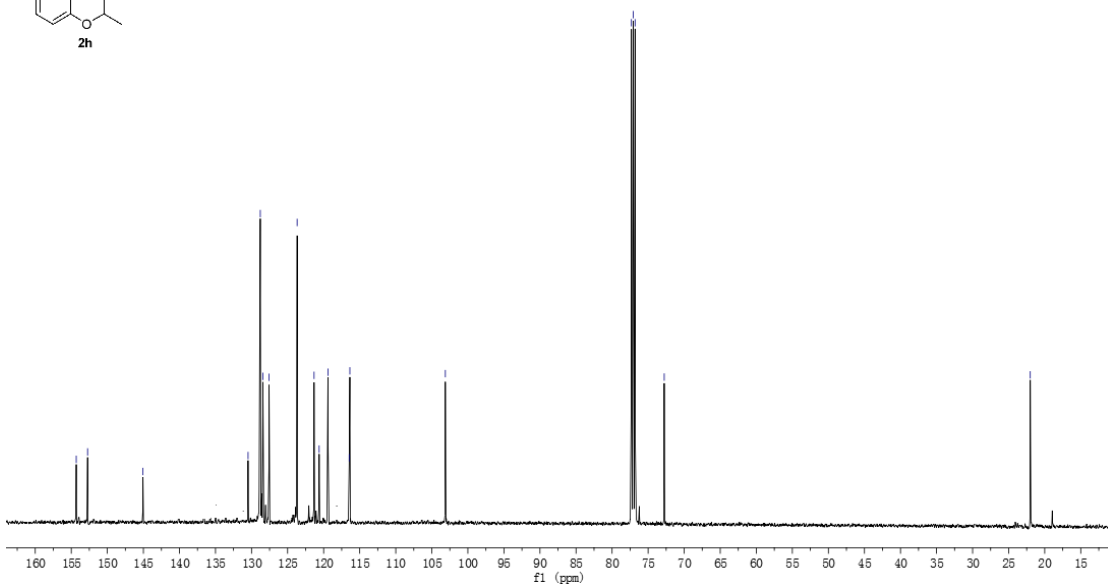

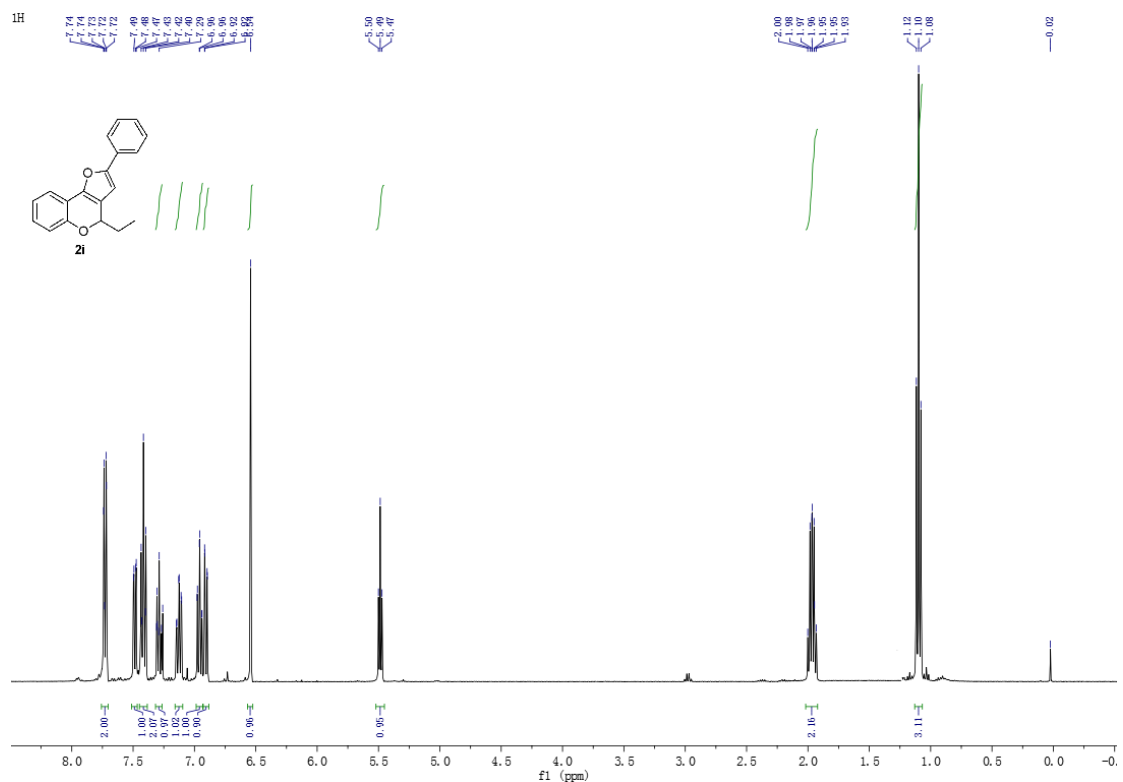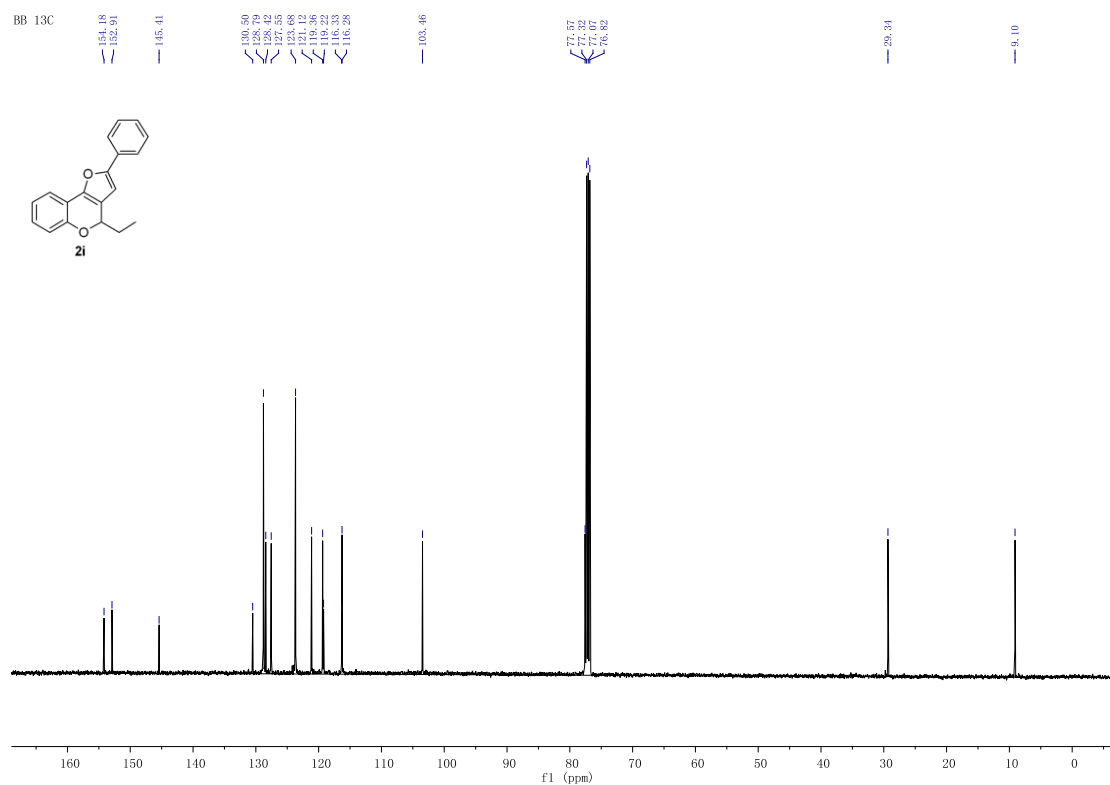



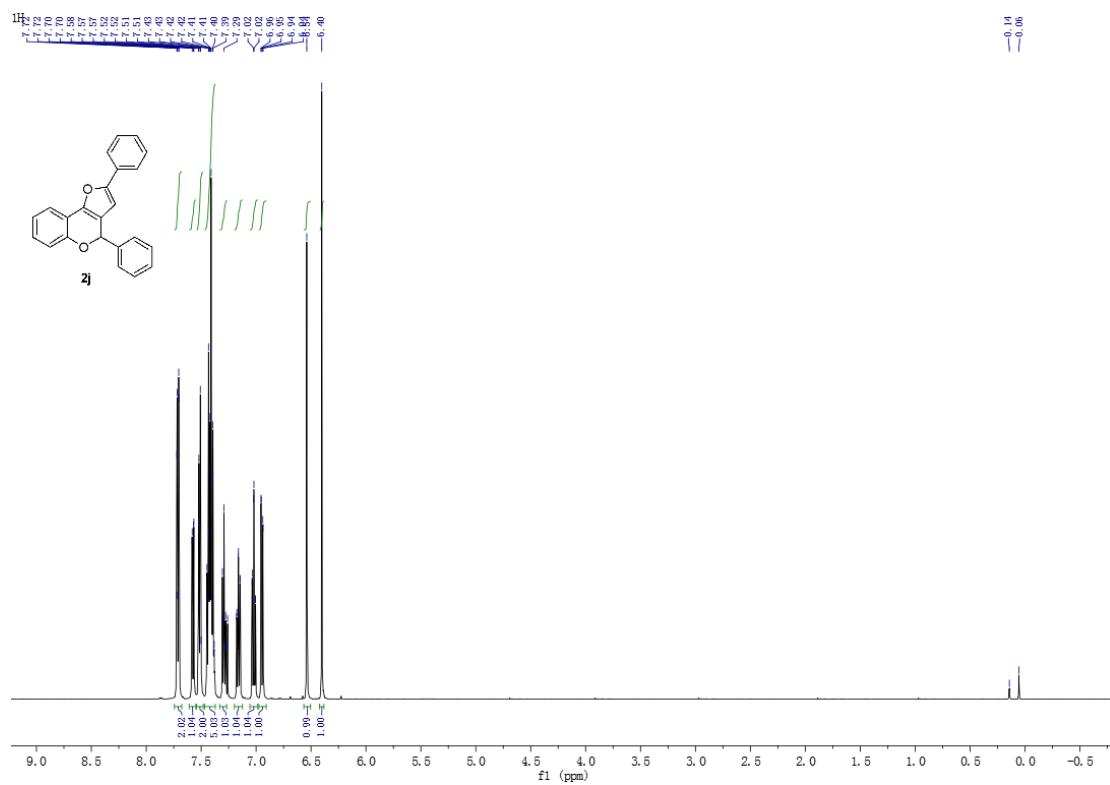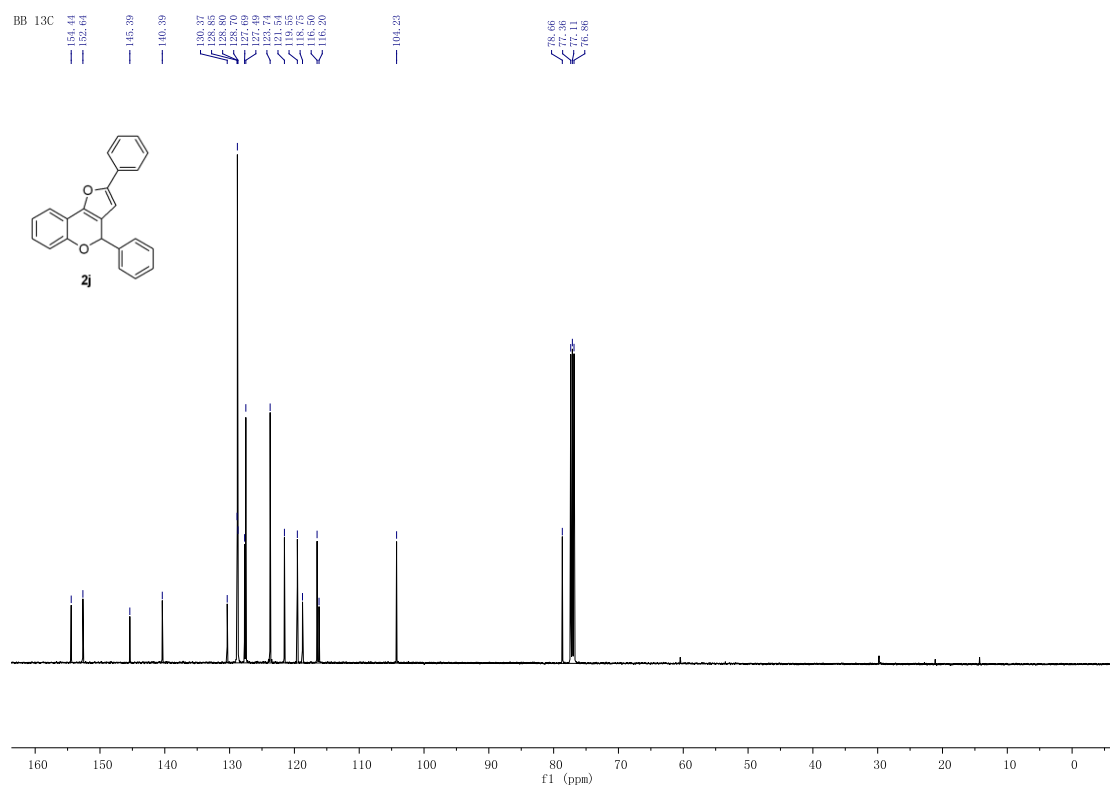

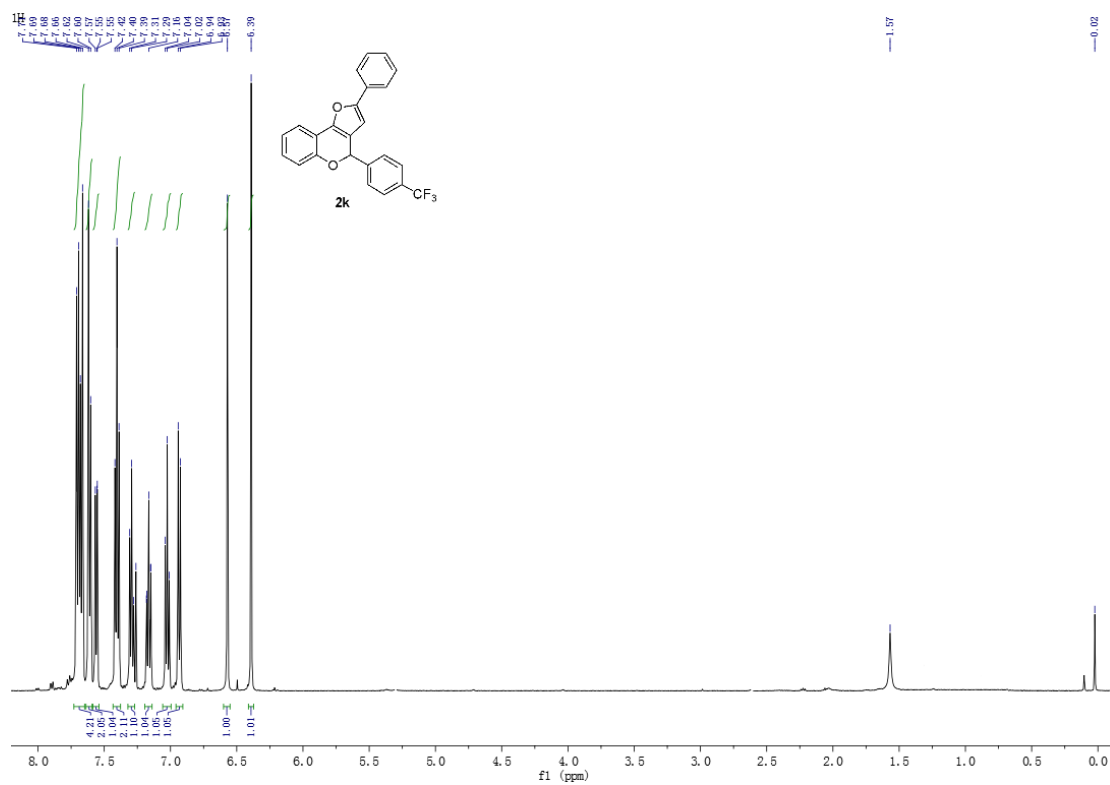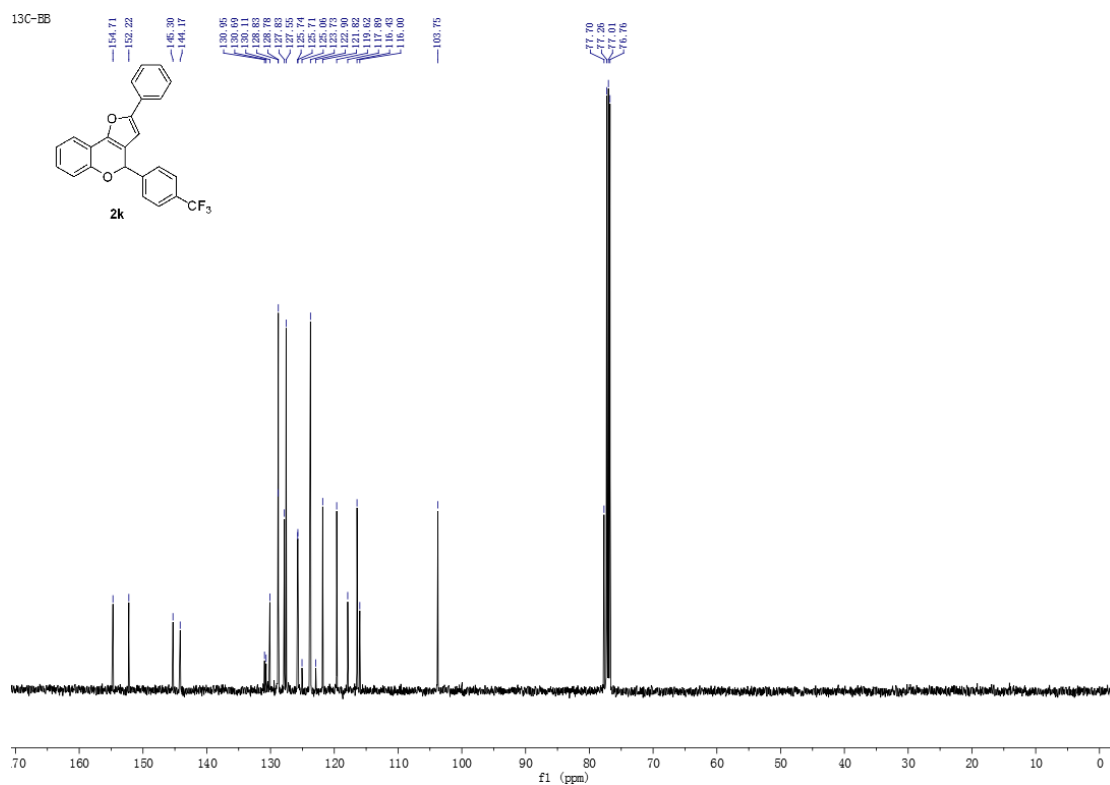

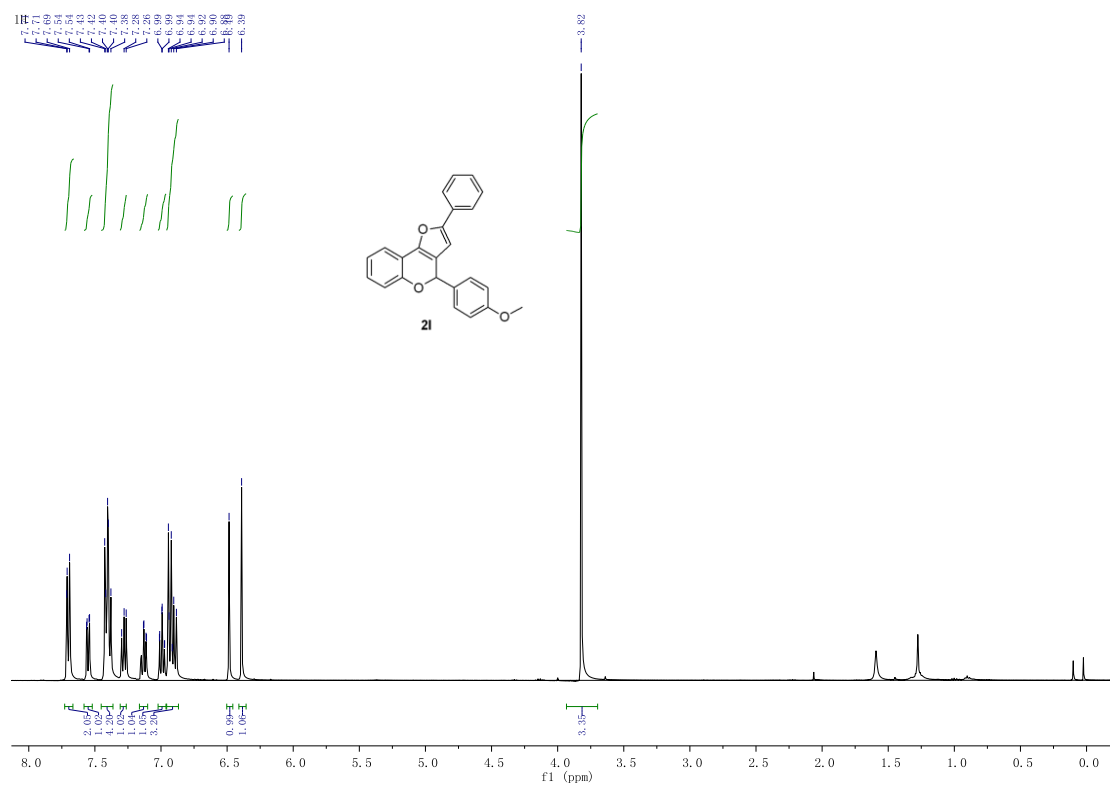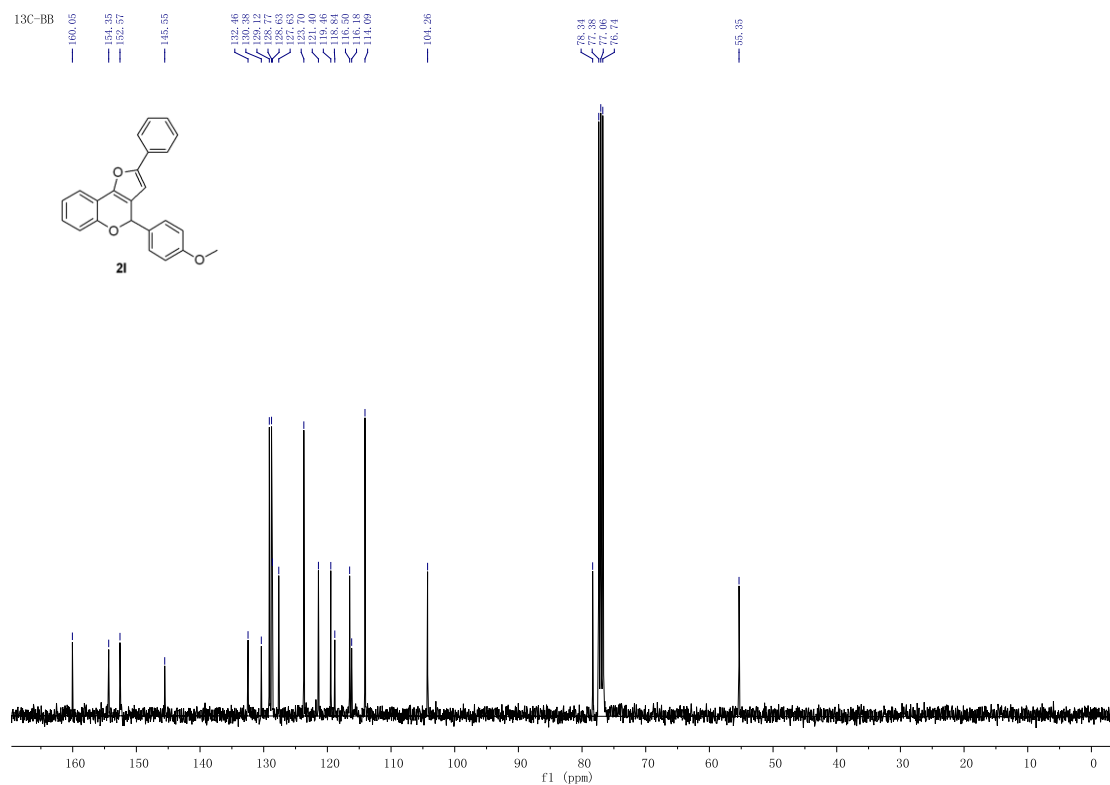

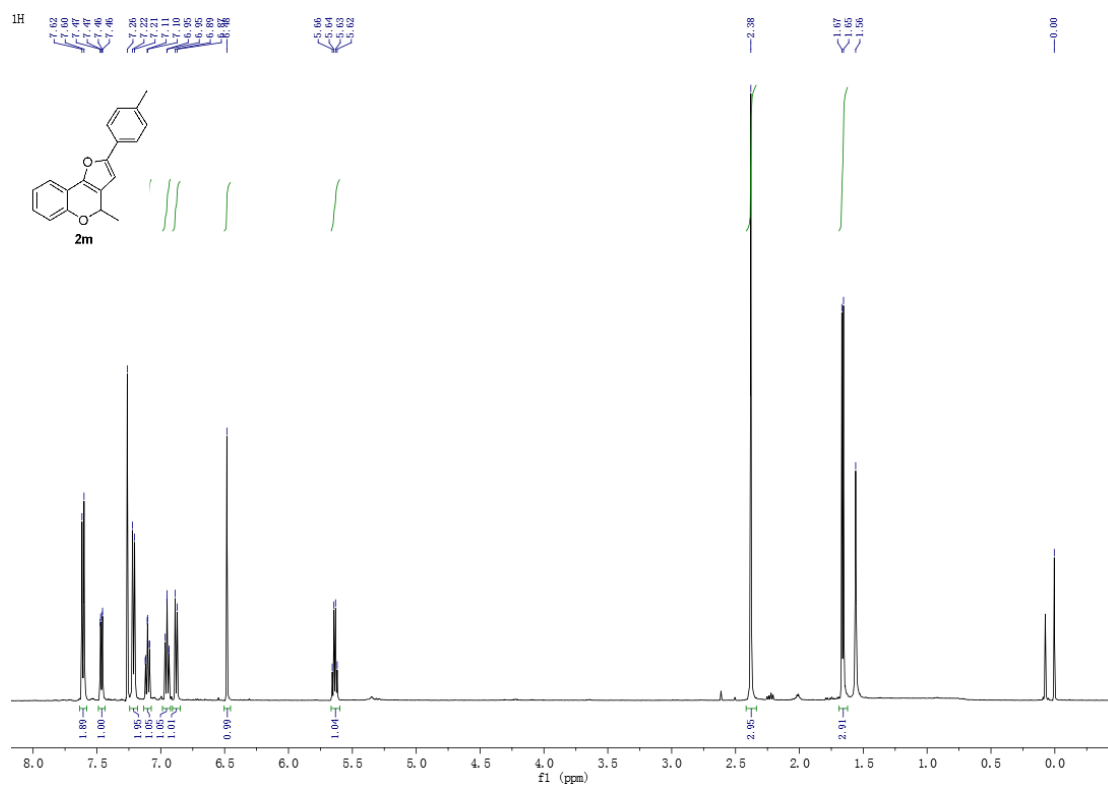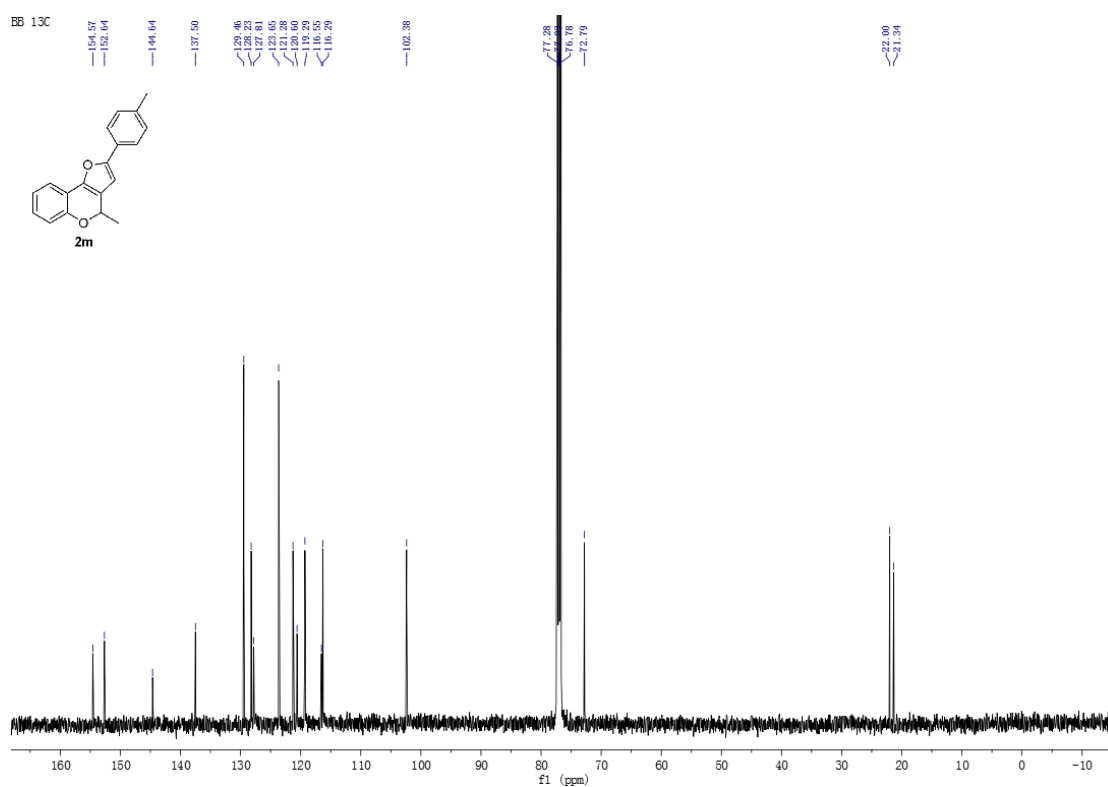

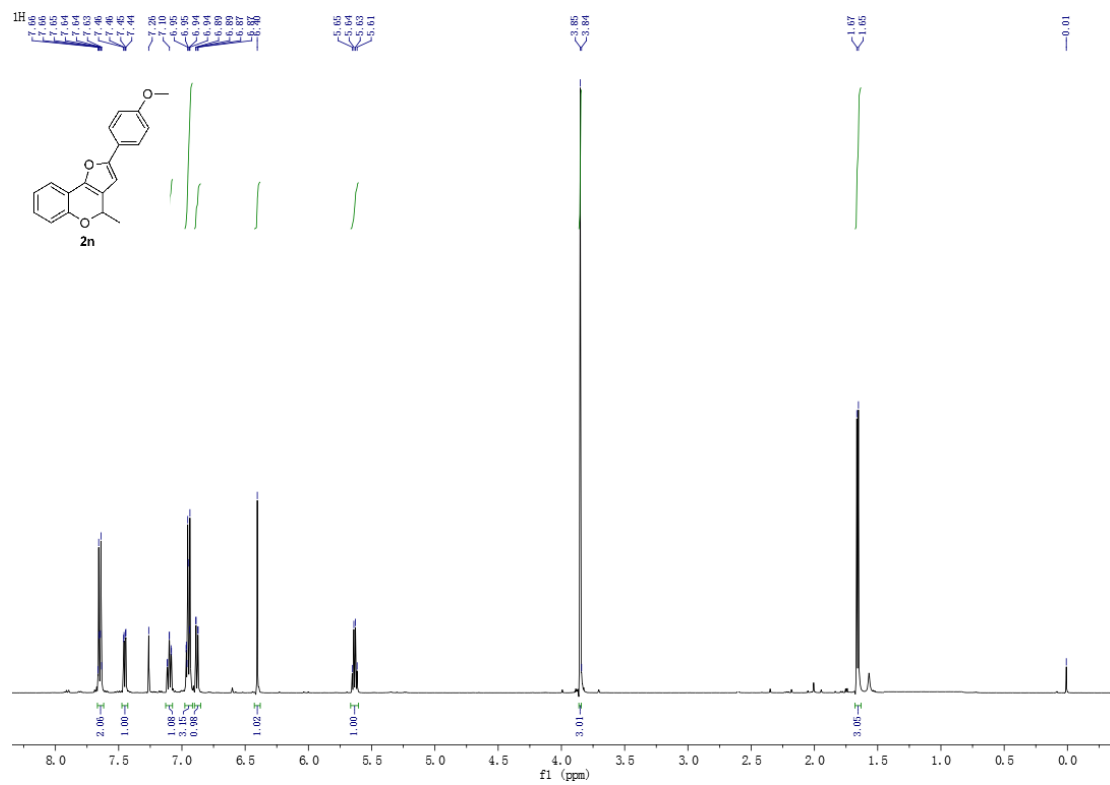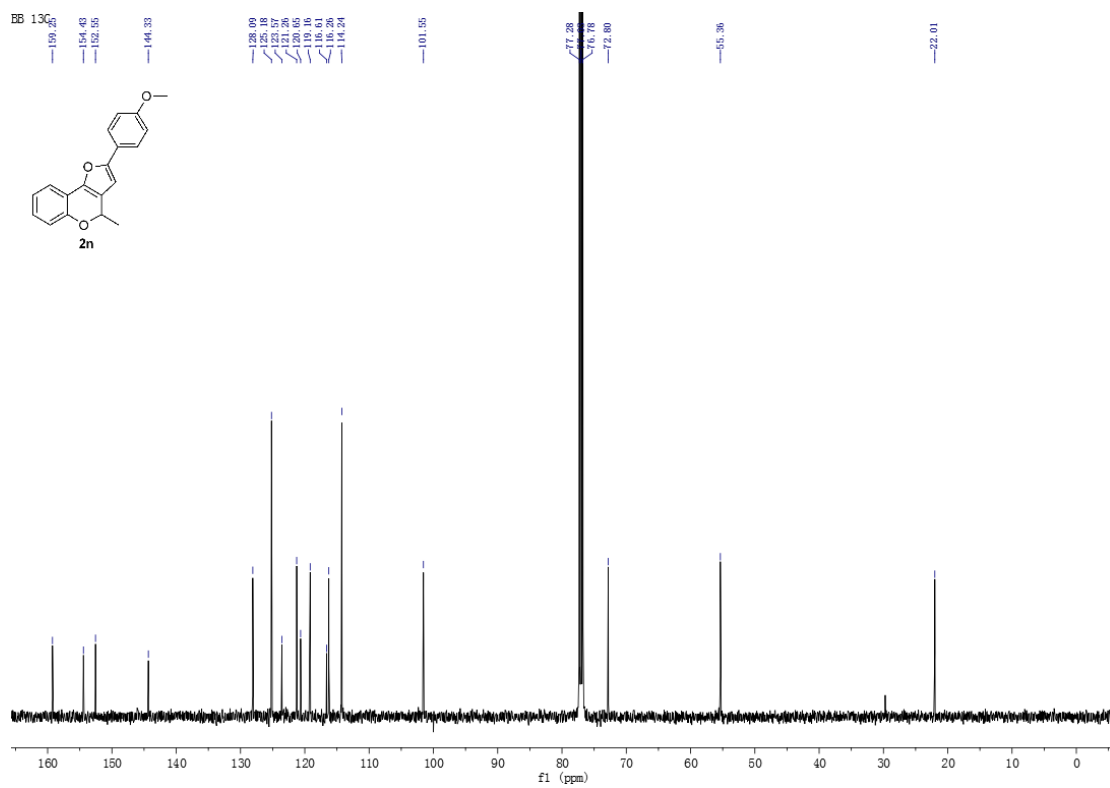

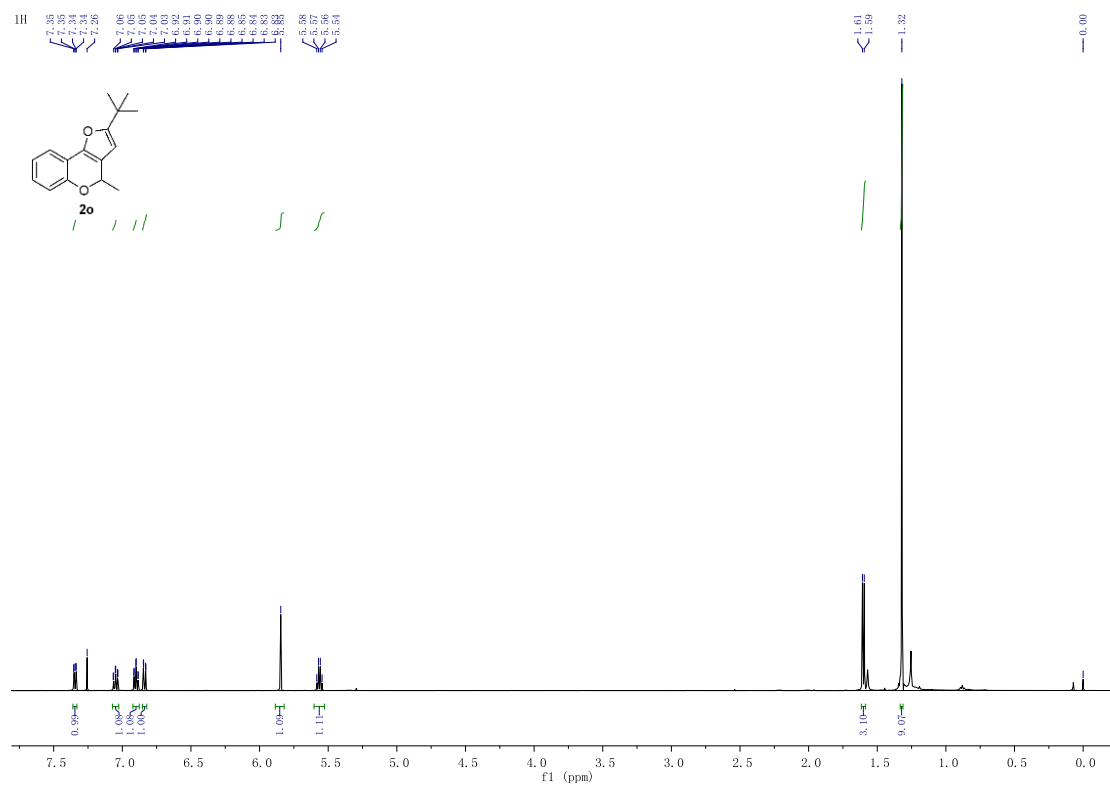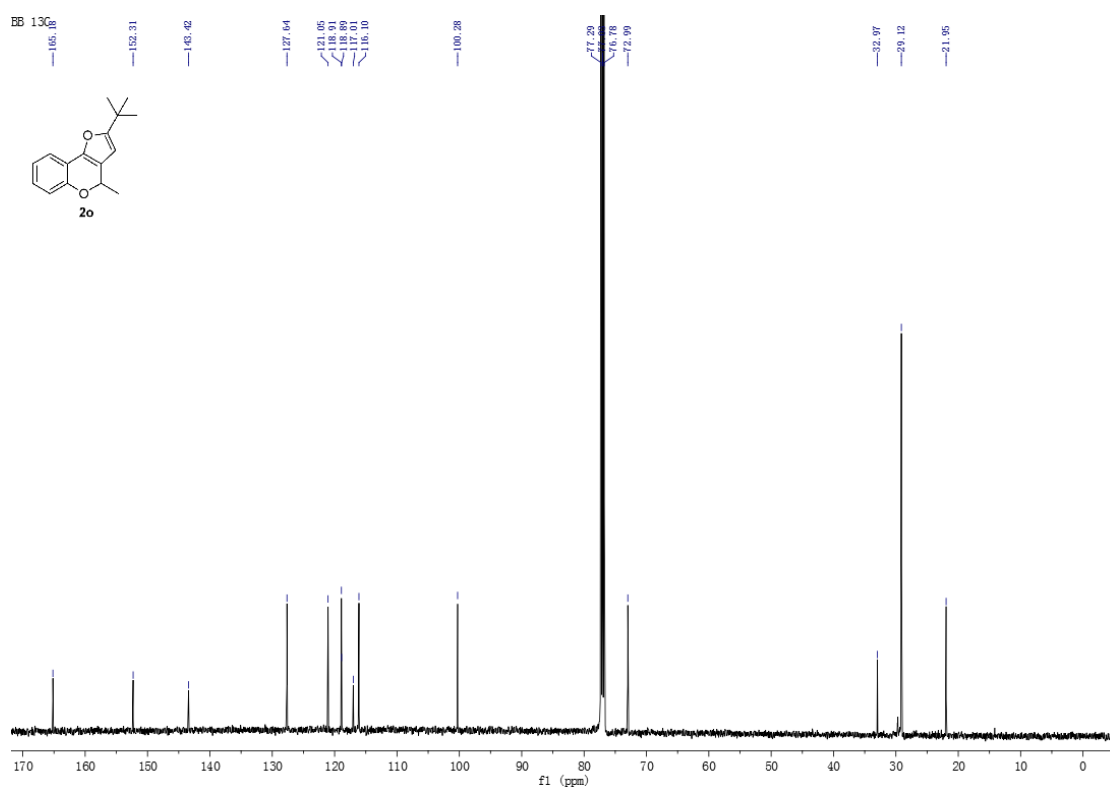

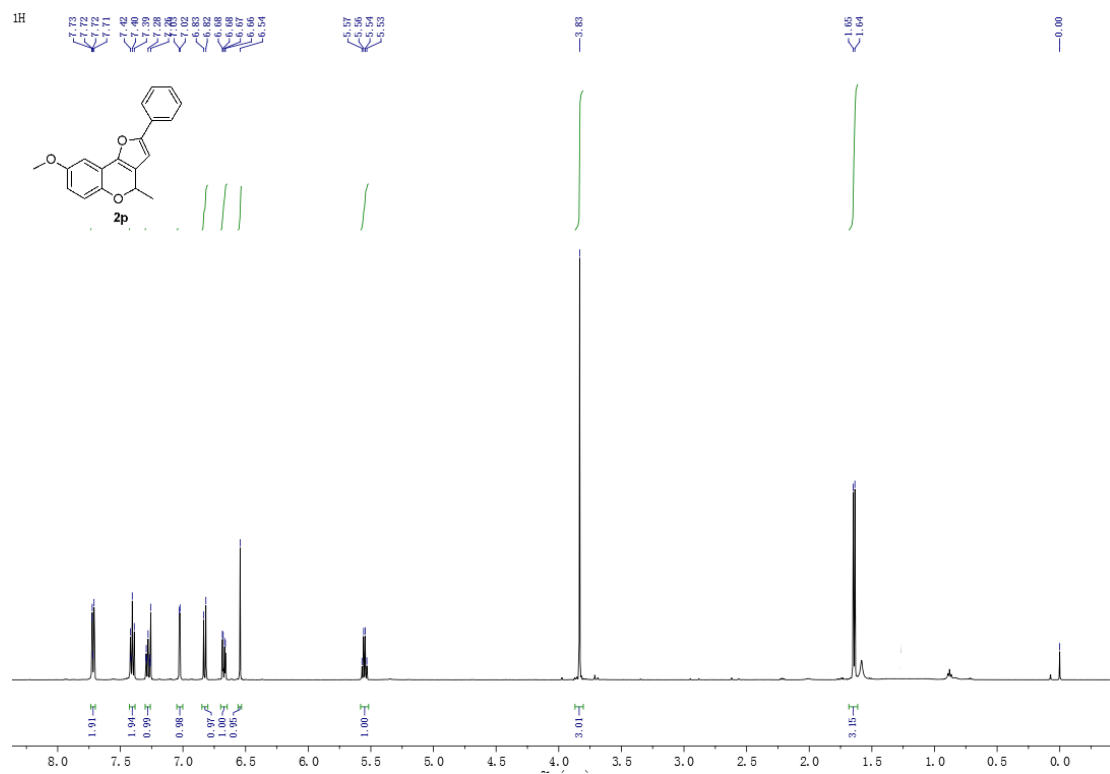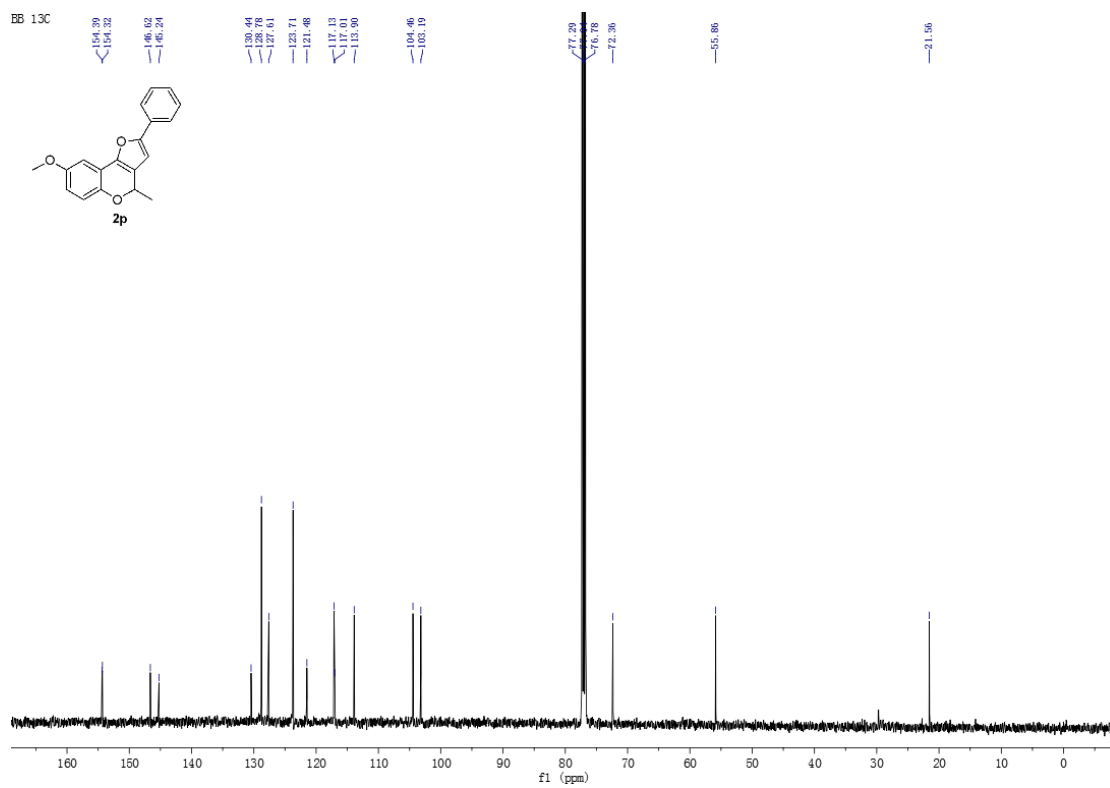

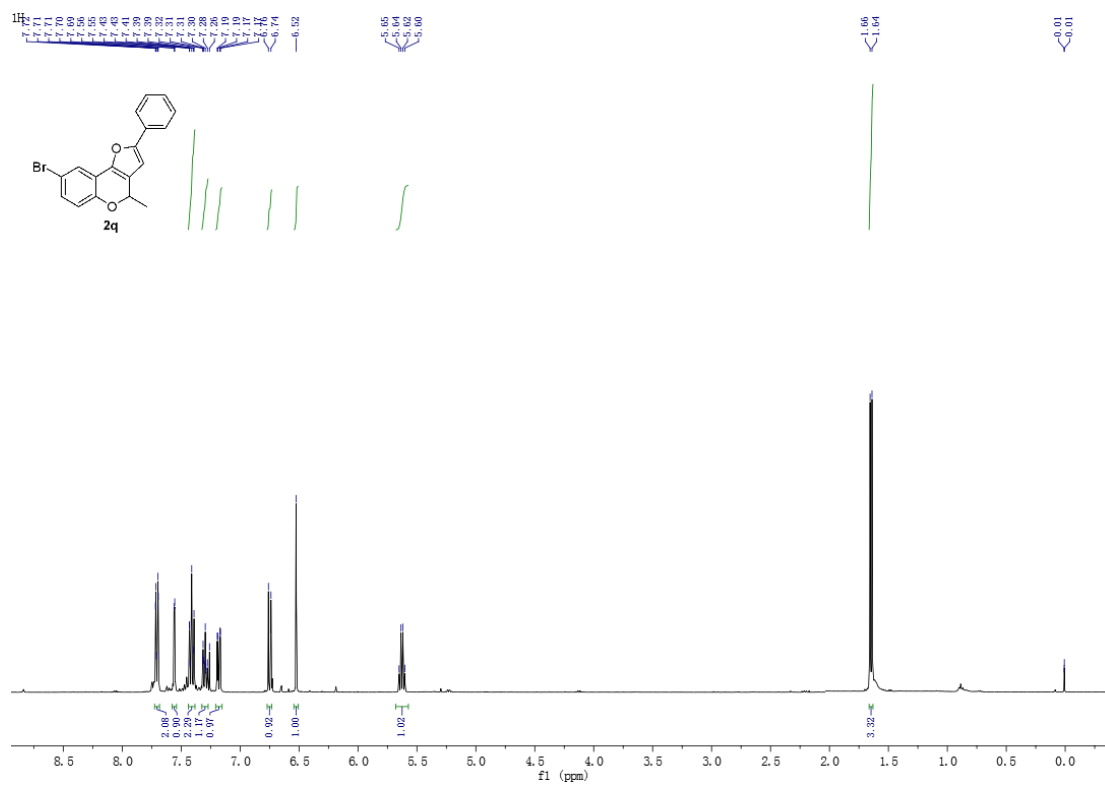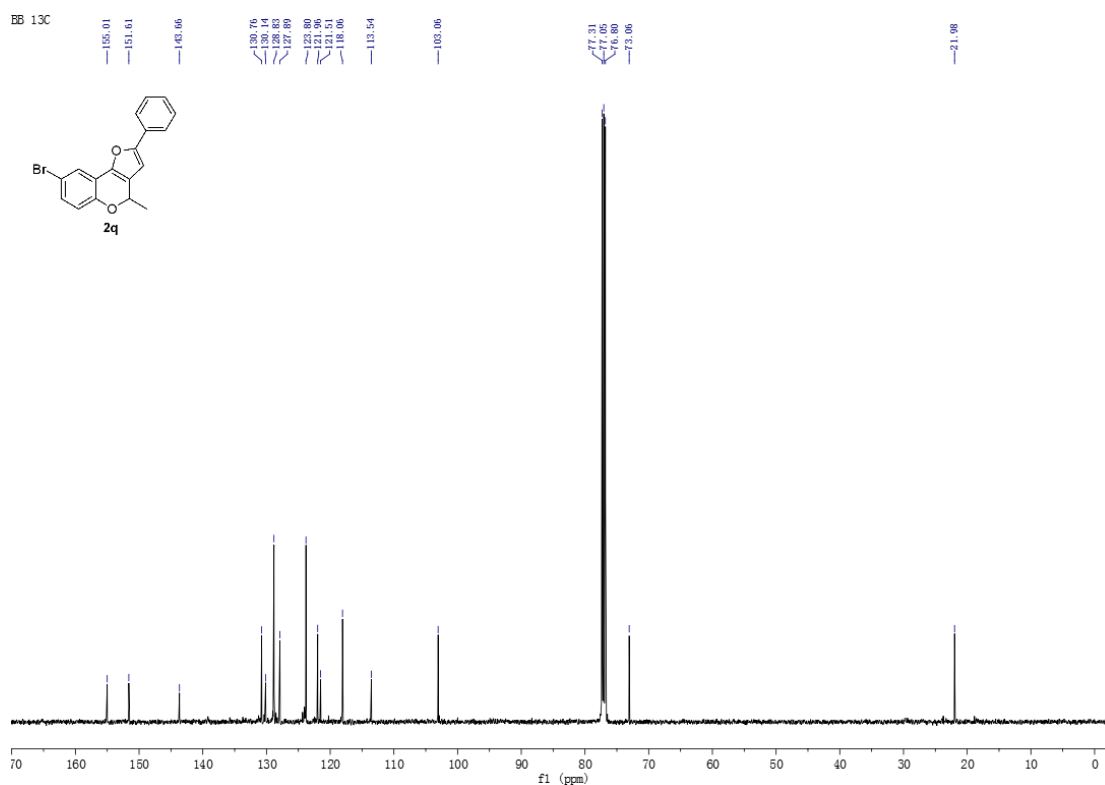



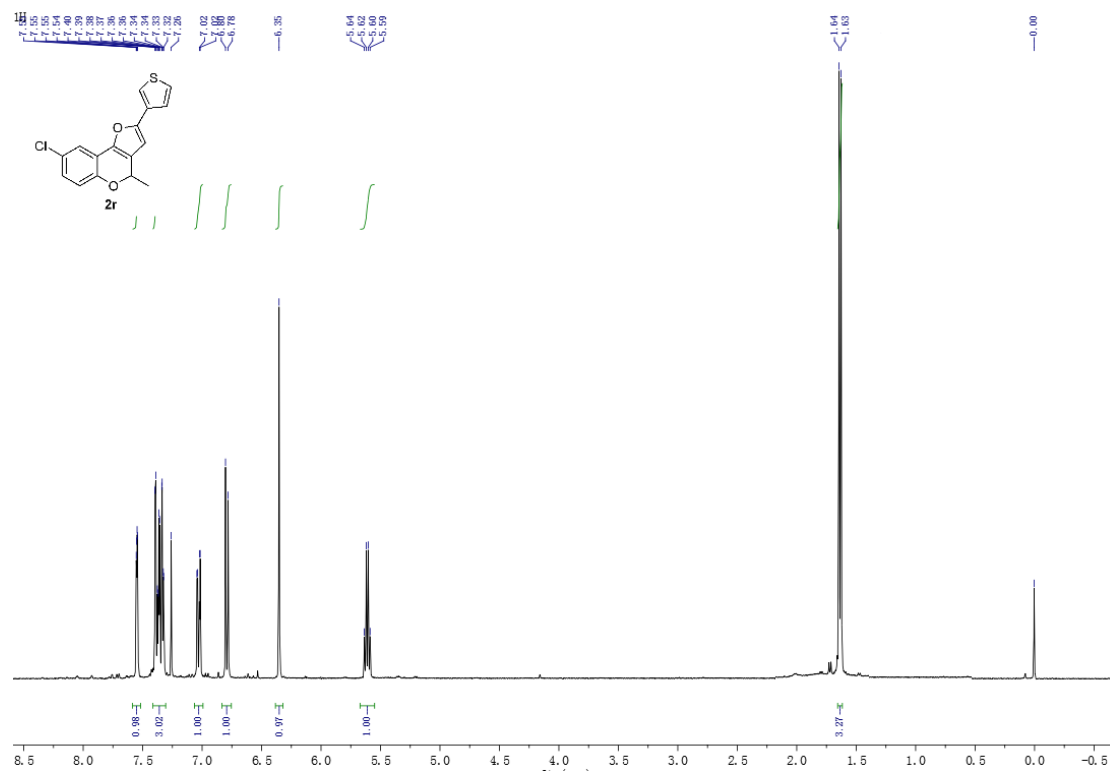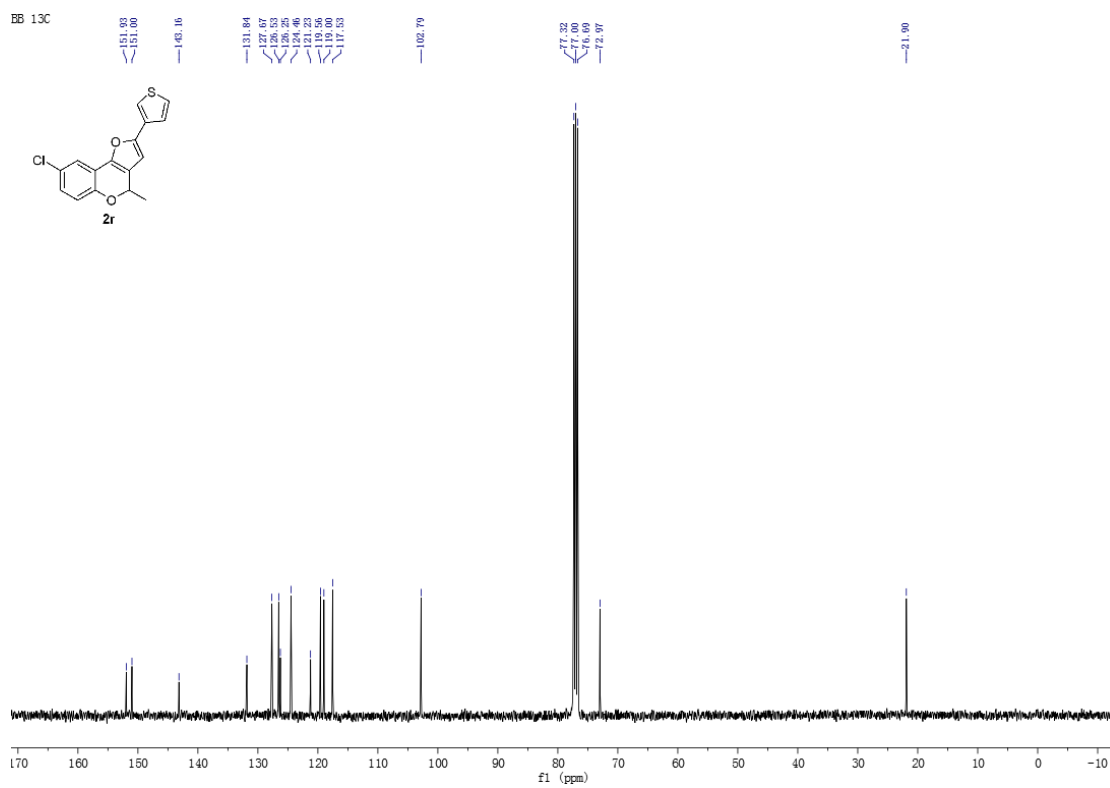

h1p83 (0919)  
 STANDARD 1H OBSERVE

8.03  
 7.74  
 7.46  
 7.13  
 7.11  
 6.99  
 6.97  
 6.89  
 6.82  
 6.86  
 6.99  
 3.93

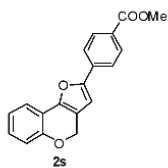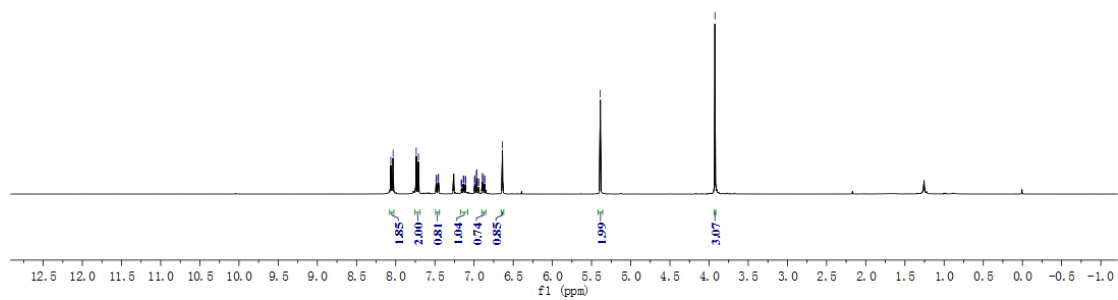

HLP93  
 HLP93 CDC13 13C-BB

166.83  
 153.32  
 146.09  
 134.24  
 130.76  
 128.69  
 123.29  
 119.81  
 116.42  
 115.96  
 105.99  
 65.81  
 52.26

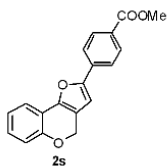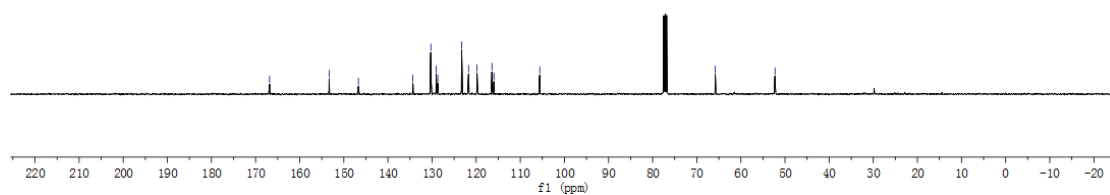

h1p95-0919  
STANDARD 1H OBSERVE

7.07 7.07 7.07 7.07  
6.42 6.42 6.42  
6.35 6.35 6.35  
6.28 6.28 6.28  
6.21 6.21 6.21  
6.14 6.14 6.14  
6.07 6.07 6.07  
6.00 6.00 6.00  
4.98 4.98  
0.03 0.03

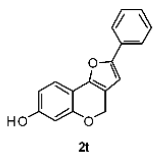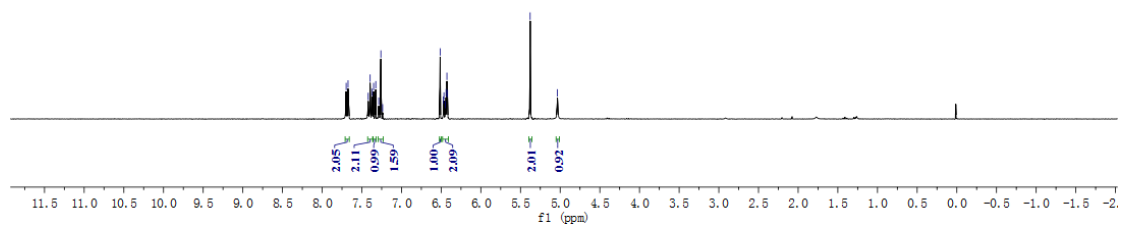

HLP95  
HLP95 CDC13 13C-BB

156.10 154.00 153.07  
146.00  
138.05 137.06 136.44 128.00 128.61  
117.25 110.55 108.59  
104.07 103.33  
46.35

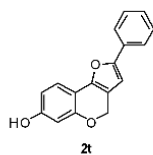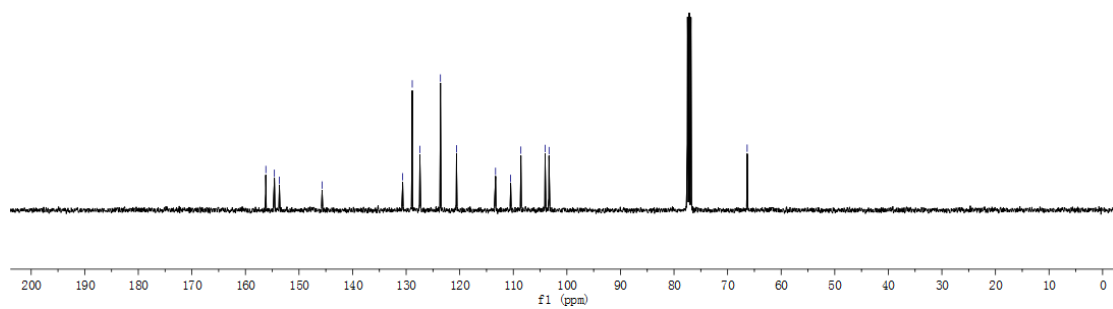

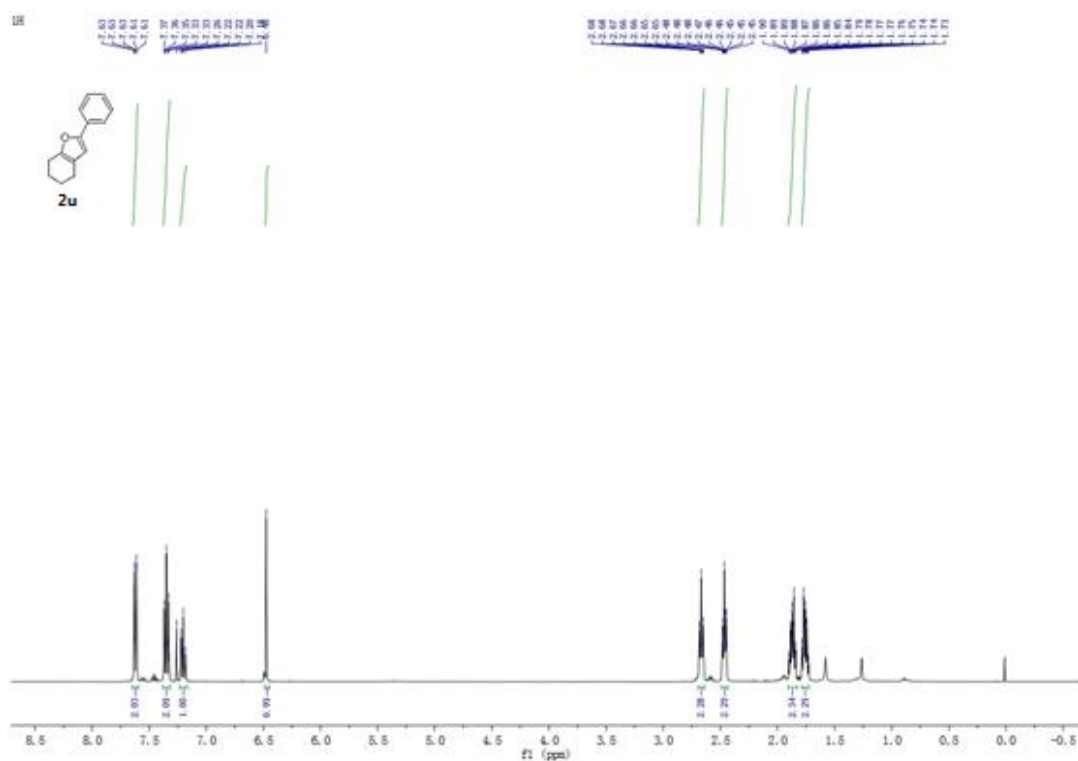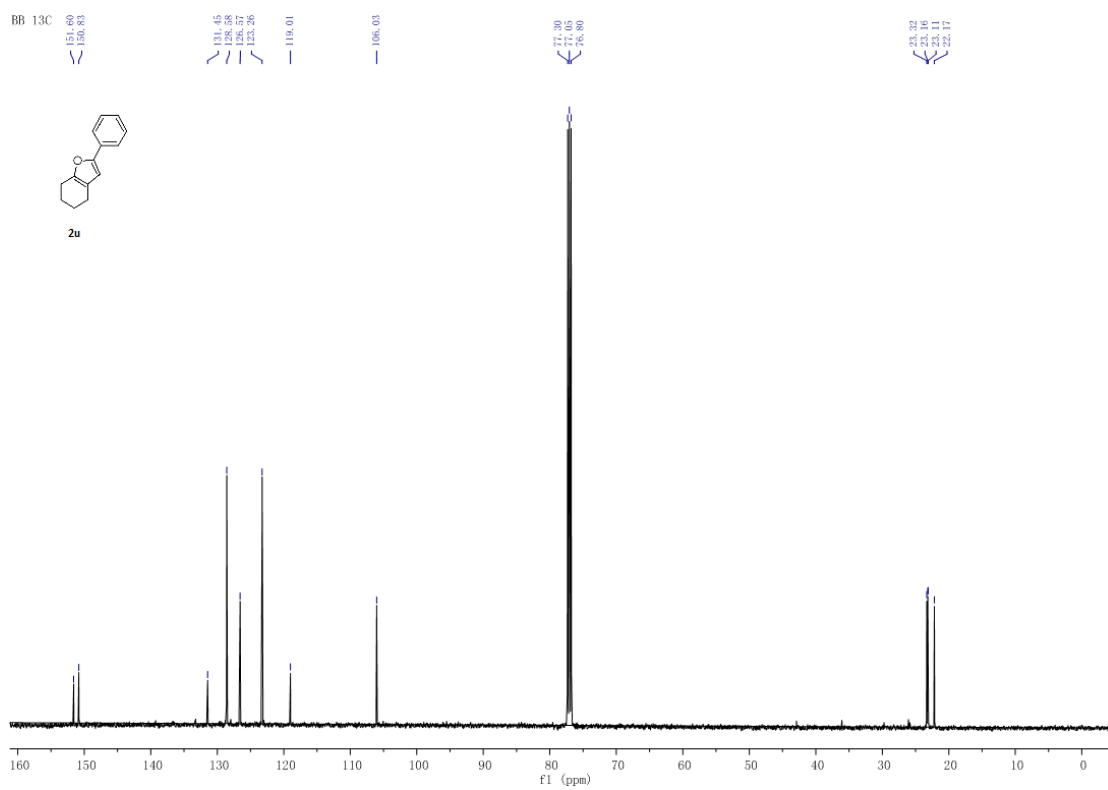

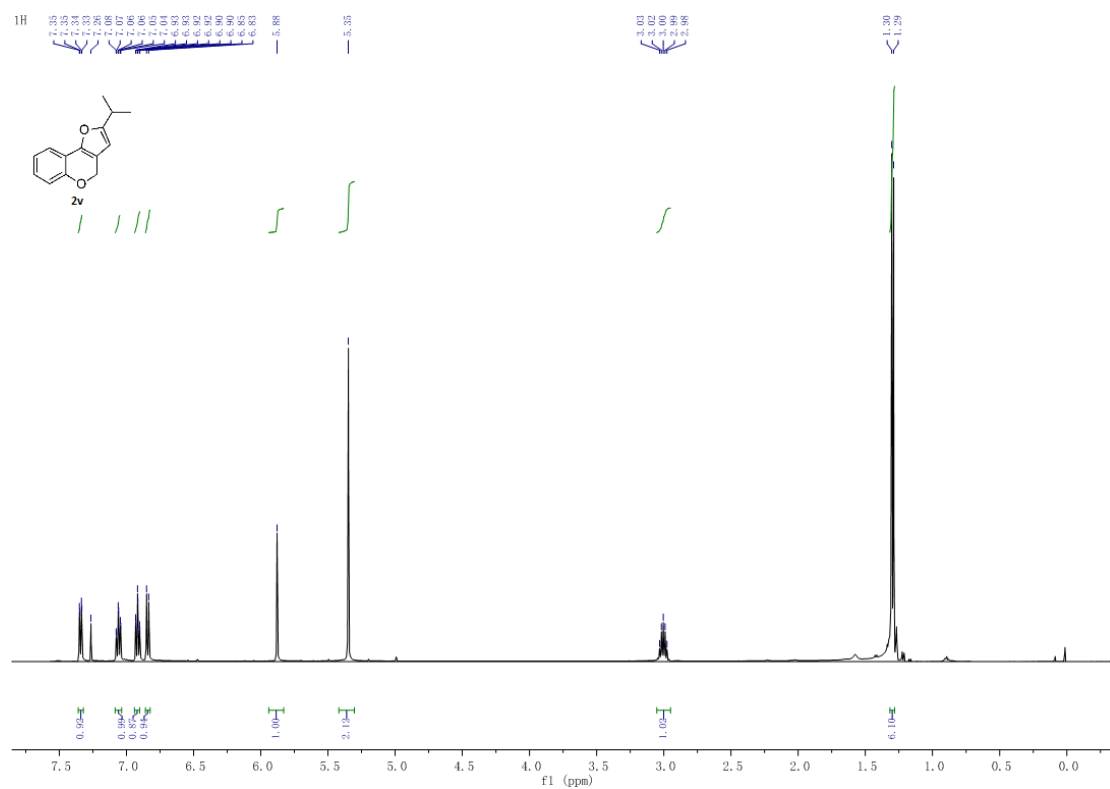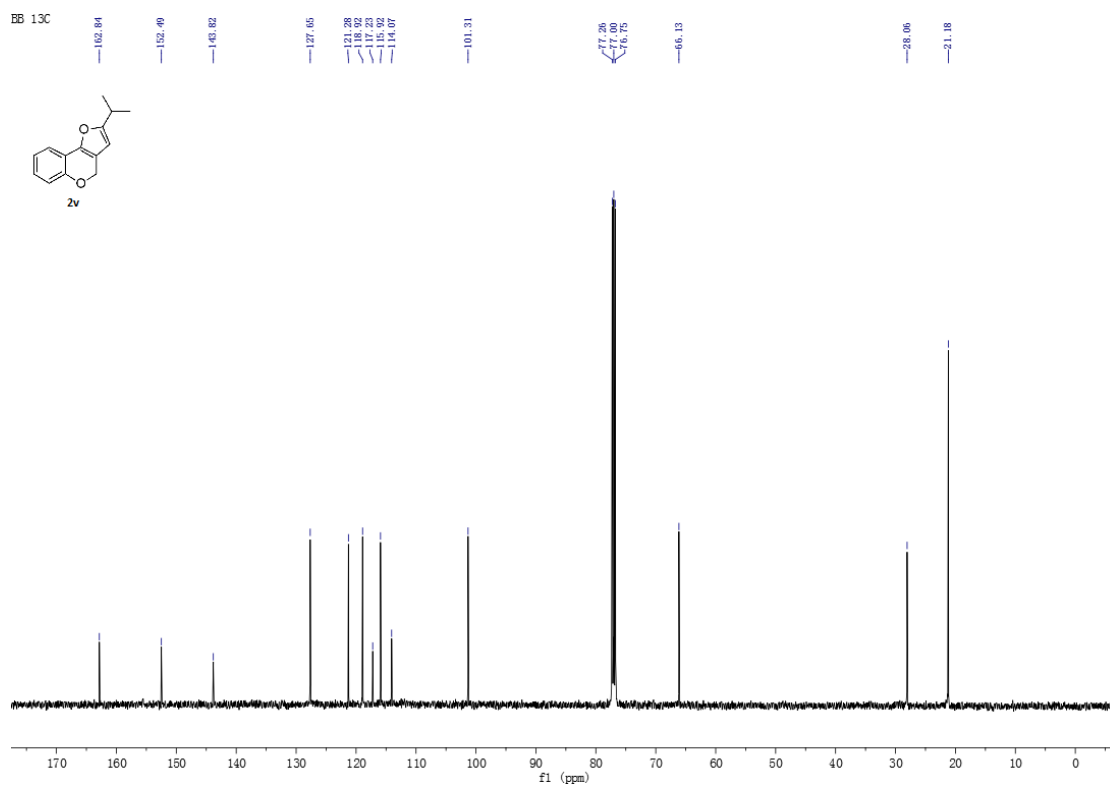

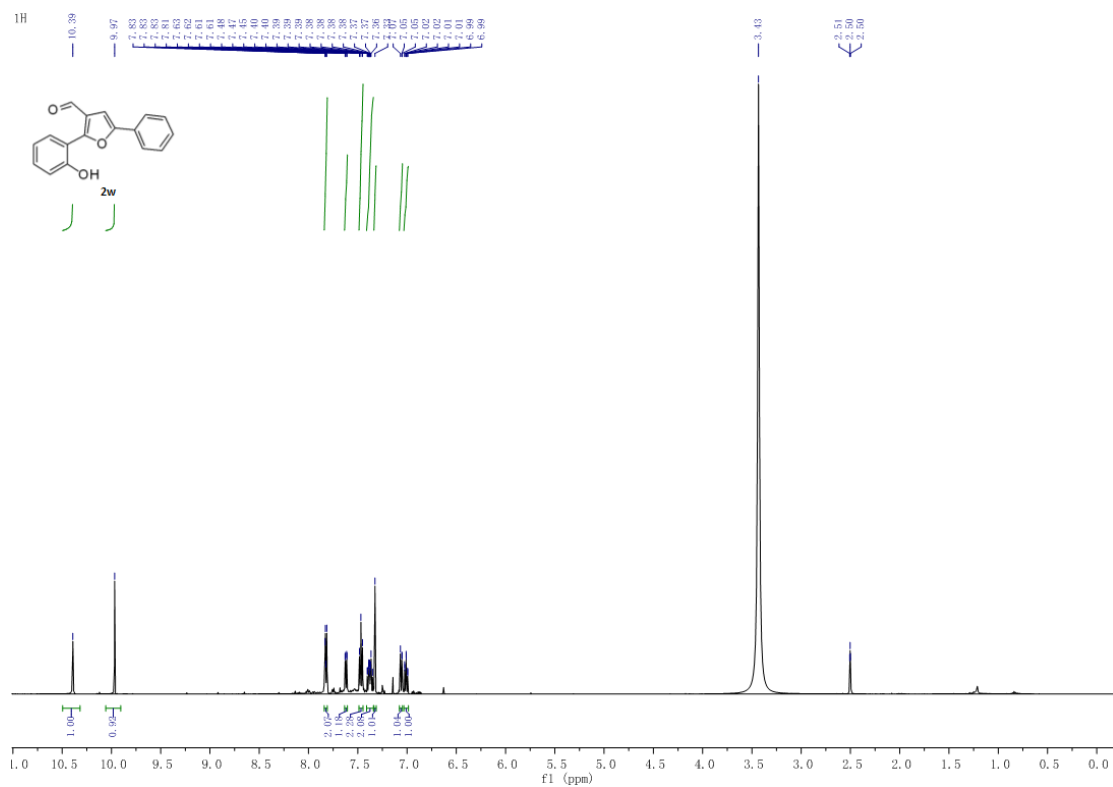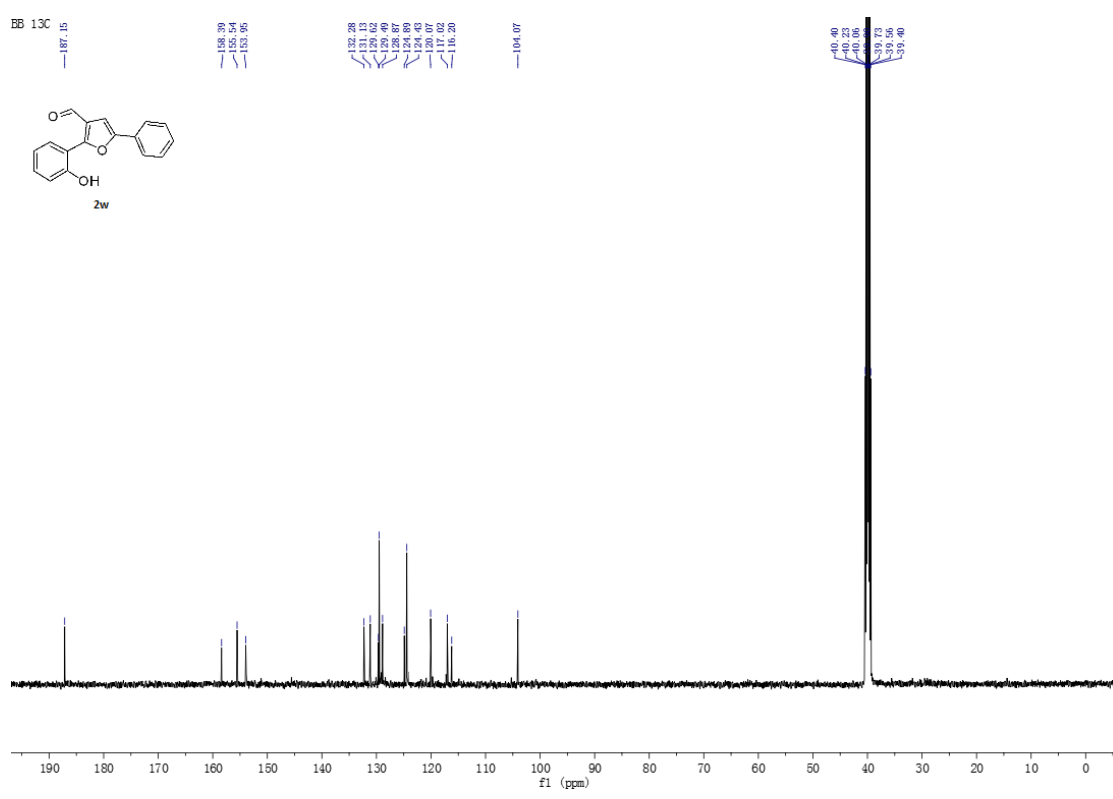

Supplement: c2ra22268j.pdf [file c2ra22268j.pdf]
